# Supplementary material for: A Genome-Wide Association Study Identifies a Novel Major Locus for Glycemic Control in Type 1 Diabetes, as Measured by Both A1C and Glucose
Source: PubMed Central journal article supplement — Diabetes. 2009 Oct 20;59(2):539–49. doi: 10.2337/db09-0653 (PMC2809960; doi:10.2337/db09-0653), 2009-10-20

**Supplementary Methods:**

**MAGIC (Meta-Analyses of Glucose and Insulin-related traits Consortium): HbA1c meta-analysis methods – see Supplementary Table 9 for list of investigators.**

We obtained summary statistics for HbA1c associations from a meta-analysis of HbA1c levels carried out by MAGIC (unpublished data). Briefly, the meta-analysis included 23 cohorts with available HbA1c measurements and GWAS genotypes, for a total of 27,589 to 36,585 individuals depending on the SNPs analyzed. Cohorts included: B58C-WTCCC (N=1,428), BLSA (N=490), DGI (N=480), EPIC cancer cases (N=957), EPIC cohort (N=1,911), Fenland (N=1,378), FHS (N=1,996), KORA F3 (N=1,644), Lolipop (N=770), SardiNIA (N=3,346), 1958BC-T1DGC (N=2,501), ARIC (N=6,777), Croatia (N=659), deCODE (N=342), DESIR (N=731), GenomeEUtwin (N=568), HEALTH2000 (N=1,205), KORA\_S4 (N=1,814), NTRNESDA (N=1,452), ORCADES (N=651), PROCARDIS (N=831), SHIP (N=3,538) and Sorbs (N=630), see (26) for details.

All participants were adults of white ancestry from Europe or the United States, and free of diabetes (define as either receiving diabetes treatment or having a fasting glucose  $\geq 7$  mmol/L). Local research ethic committees approved all studies and all participants gave informed consent. In each study glycated hemoglobin (HbA1c, in %) was measured from whole blood (fasting or non-fasting), with NGSP-certified methods. SNPs were either directly genotyped or imputed from the HapMap CEU phase 2 reference panel using the software MACH or IMPUTE. QC metrics were applied to genotyped (Hardy-Weinberg equilibrium  $P < 10^{-4}$  or  $10^{-6}$  and call-rate  $< 0.90$  or  $0.95$ ) and imputed (observed-by-expected variance ratio (r2.hat)  $< 0.3$  (if MACH was used for imputation), proper-info  $< 0.4$  (if IMPUTE was used)) SNPs. In each cohort, a linear regression model was fitted using untransformed HbA1c as the dependent variable to evaluate the additive effect of genotyped and imputed SNPs, adjusting for age, sex, study-site (when applicable) and/or family structure. Regression estimates for each SNP were combined across studies in a meta-analysis using a fixed effect inverse-variance approach, as implemented in METAL software.

**Supplementary Table 1.** Association results for mean HbA1c in DCCT, separately by treatment group and combined, for SNPs that have previously been associated with HbA1c in non-diabetic individuals (see introduction for details and references).

| chr | snp        | position    | Gene region  | alleles | freq1 | rsqr | Conventional Group p value | Intensive Group p value | Combined Groups p value |
|-----|------------|-------------|--------------|---------|-------|------|----------------------------|-------------------------|-------------------------|
| 2   | rs1260326  | 27,584,444  | GCKR         | C,T     | 0.59  | 1    | 0.34                       | 0.15                    | 0.76                    |
| 2   | rs780094   | 27,594,741  | GCKR         | C,T     | 0.6   | 1    | 0.33                       | 0.15                    | 0.77                    |
| 2   | rs1402837  | 169,465,600 | G6PC2/ABCB11 | C,T     | 0.78  | 1    | 0.93                       | 0.36                    | 0.49                    |
| 2   | rs560887   | 169,471,394 | G6PC2/ABCB11 | C,T     | 0.71  | 1    | 0.86                       | 0.6                     | 0.79                    |
| 2   | rs563694   | 169,482,317 | G6PC2/ABCB11 | A,C     | 0.66  | 1    | 0.87                       | 0.99                    | 0.96                    |
| 2   | rs552976   | 169,499,684 | G6PC2/ABCB11 | A,G     | 0.35  | 1    | 0.68                       | 0.90                    | 1.00                    |
| 2   | rs6709087  | 169,507,256 | G6PC2/ABCB11 | A,G     | 0.77  | 1    | 0.54                       | 0.34                    | 0.87                    |
| 7   | rs10244051 | 15,030,358  | -            | G,T     | 0.54  | 1    | 0.23                       | 0.34                    | 0.13                    |
| 7   | rs2191348  | 15,030,780  | -            | G,T     | 0.46  | 1    | 0.23                       | 0.35                    | 0.14                    |
| 7   | rs1799884  | 44,195,593  | GCK          | C,T     | 0.82  | 1    | 0.33                       | 0.25                    | 0.1                     |
| 7   | rs730497   | 44,263,224  | GCK          | A,G     | 0.18  | 1    | 0.32                       | 0.25                    | 0.10                    |
| 7   | rs4607517  | 44,275,173  | GCK          | A,G     | 0.18  | 1    | 0.36                       | 0.24                    | 0.10                    |
| 8   | rs2722425  | 40,603,396  | ZMAT4        | C,T     | 0.89  | 1    | 0.9                        | 0.19                    | 0.49                    |
| 8   | rs13266634 | 118,253,694 | SLC30A8      | C,T     | 0.69  | 1    | <b>0.03</b>                | <b>0.08</b>             | 0.73                    |
| 9   | rs4240702  | 136,735,680 | -            | C,T     | 0.54  | 1    | 0.84                       | 0.65                    | 0.58                    |
| 10  | rs906216   | 70,768,201  | HK1          | G,T     | 0.55  | 1    | 0.61                       | 0.87                    | 0.62                    |
| 10  | rs7072268  | 70,769,919  | HK1          | C,T     | 0.52  | 1    | 0.69                       | 0.81                    | 0.76                    |
| 10  | rs2305198  | 70,798,881  | HK1          | C,T     | 0.39  | 1    | 0.35                       | 0.16                    | 0.17                    |
| 10  | rs7901695  | 114,744,078 | TCF7L2       | C,T     | 0.32  | 1    | 0.36                       | 0.23                    | 0.80                    |
| 11  | rs1387153  | 92,313,476  | MTNR1B       | C,T     | 0.71  | 1    | 0.37                       | 0.51                    | 0.75                    |
| 11  | rs10765573 | 92,322,980  | MTNR1B       | A,T     | 0.34  | 0.99 | 0.12                       | 0.44                    | 0.51                    |
| 11  | rs7936247  | 92,329,680  | MTNR1B       | G,T     | 0.66  | 0.99 | 0.12                       | 0.45                    | 0.51                    |
| 11  | rs11020124 | 92,330,309  | MTNR1B       | C,T     | 0.29  | 0.97 | 0.37                       | 0.55                    | 0.74                    |
| 11  | rs10830963 | 92,348,358  | MTNR1B       | C,G     | 0.7   | 0.88 | 0.18                       | 0.3                     | 0.65                    |
| 11  | rs1447352  | 92,362,409  | MTNR1B       | A,G     | 0.52  | 1    | 0.15                       | 0.24                    | 0.68                    |

**Supplementary Table 2. Definitions of complications outcomes, statistical models, covariates included and the prevalence of outcomes separately by treatment group**

| System                                | Specific outcome                                                                                                                                                                            | Time period        | Model                                      | Covariates                                            | Outcome Frequency (number with event /number censored) etc.        | Conventional                                              | Intensive                                                 |
|---------------------------------------|---------------------------------------------------------------------------------------------------------------------------------------------------------------------------------------------|--------------------|--------------------------------------------|-------------------------------------------------------|--------------------------------------------------------------------|-----------------------------------------------------------|-----------------------------------------------------------|
| <b>Retinal</b> <sup>29, 43</sup>      |                                                                                                                                                                                             |                    |                                            |                                                       |                                                                    |                                                           |                                                           |
|                                       | <b>Mild Retinopathy:</b> Time from DCCT baseline to mild non-proliferative diabetic retinopathy (EDTRS step 4, patient level 35/<35) *                                                      | DCCT and EDIC yr10 | Cox Proportional Hazards                   | Stratified by DCCT year of entry, cohort as covariate | 75% (807 vs 264), 1071                                             | 85% (453 vs 82), 535                                      | 66% (354 vs 182), 536                                     |
|                                       | <b>Severe retinopathy:</b> Time from DCCT baseline to severe non-proliferative retinopathy (ETDRS step 10, patient level at least 53/<53) or scatter laser                                  | “                  | “                                          | “                                                     | 19% (246 vs 1057) = 1304                                           | 27% (178 vs 488), 666                                     | 11% (68 vs 569), 637                                      |
|                                       | <b>Clinically Significant Macular Edema:</b> Time from DCCT baseline to macular edema or focal laser                                                                                        | “                  | “                                          | “                                                     | 18% (240 vs 1064) =1303                                            | 24% (162 vs 505), 667                                     | 12% (78 vs 559), 637                                      |
| <b>Renal</b> <sup>11, 29</sup>        |                                                                                                                                                                                             |                    |                                            |                                                       |                                                                    |                                                           |                                                           |
|                                       | <b>Persistent Microalbuminuria:</b> Time from DCCT baseline to the first of two consecutive visits with Albumin Excretion Rate >30 mg/day                                                   | DCCT and EDIC yr12 | ”                                          | “                                                     | 22% (268 vs 976)                                                   | 28% (177 vs 462), 639                                     | 15% (91 vs 514), 605                                      |
|                                       | <b>Severe nephropathy:</b> Time from DCCT entry to either Albumin Excretion Rate >300 mg/day or dialysis or transplant (plus two consecutive visits with Albumin Excretion Rate >30 mg/day) | “                  | “                                          | “                                                     | 10% (132 vs 1172)                                                  | 15% (101 vs 566), 667                                     | 5% (32 vs 605), 637                                       |
| <b>Cardiac</b> <sup>10</sup>          |                                                                                                                                                                                             |                    |                                            |                                                       |                                                                    |                                                           |                                                           |
|                                       | <b>Coronary Calcium</b>                                                                                                                                                                     | EDIC yr 7-9        | Tobit regression with log coronary calcium | 4 models with difference covariates                   | 759 (69%) with zero values, 1102                                   | 382 with zero values, median in 176 >0 is 74              | 377 with zero values, median in 167 with >0 is 51         |
| <b>Neuropathy</b> <sup>1</sup>        |                                                                                                                                                                                             |                    |                                            |                                                       |                                                                    |                                                           |                                                           |
|                                       | <b>Confirmed Clinical Neuropathy</b>                                                                                                                                                        | EDIC yr 13/14      | Logistic regression                        | none                                                  | 30%, 303 case, 723 control, 1026 total                             | 34%, 171 case, 334 control, 505 total                     | 25%, 132 case, 389 control, 521 total                     |
| <b>System</b>                         | <b>Specific outcome</b>                                                                                                                                                                     | <b>Time period</b> | <b>Model</b>                               | <b>Covariates</b>                                     | <b>Outcome Frequency (number with event /number censored) etc.</b> | <b>Conventional</b>                                       | <b>Intensive</b>                                          |
| <b>Hypoglycemia</b> <sup>44, 45</sup> |                                                                                                                                                                                             |                    |                                            |                                                       |                                                                    |                                                           |                                                           |
|                                       | <b>Requiring medical assistance (DEF2)</b>                                                                                                                                                  | During DCCT        | Ordinal regression                         | none                                                  | 656 with no events, 198 with one event, 450 with >1 event          | 429 with no events, 100 with one event, 138 with >1 event | 227 with no events, 98 with one event, 312 with >1 event  |
|                                       | <b>Resulting in coma/seizure (DEF1)</b>                                                                                                                                                     | “                  | “                                          | none                                                  | 938 with no events, 187 with one event, 179 with >1 event          | 540 with no events, 82 with one event, 45 with >1 event   | 398 with no events, 105 with one event, 134 with >1 event |

\*Approximately 20% of the secondary intervention cohort had Mild Retinopathy at baseline thus the smaller sample size for time-to-event.

**Supplementary Table 3.** Association results of top 13 SNPs for HbA1c in DCCT with renal complications in DCCT/EDIC.

| nearest gene | chr | pos         | snp        | trx          | mild renal   |             |             |                    |                      | severe renal |             |             |                    |                      |
|--------------|-----|-------------|------------|--------------|--------------|-------------|-------------|--------------------|----------------------|--------------|-------------|-------------|--------------------|----------------------|
|              |     |             |            |              | hazard ratio | HR lower CI | HR upper CI | univariate p value | multivariate p value | hazard ratio | HR lower CI | HR upper CI | univariate p value | multivariate p value |
| BNC2         | 9   | 16,791,850  | rs2254193  | intensive    | 0.7726       | 0.4215      | 1.4159      | 3.88E-1            | 3.97E-1              | 9E-08        | 0           | 3.3248      | 8.95E-4            | 2.29E-3              |
| BNC2         | 9   | 16,791,850  | rs2254193  | conventional | 1.9806       | 1.3865      | 2.8292      | 5.32E-4            | 1.38E-3              | 2.1222       | 1.3545      | 3.3248      | 2.51E-3            | 1.29E-2              |
| BNC2         | 9   | 16,791,850  | rs2254193  | combined     | 1.3411       | 0.9847      | 1.8266      | 7.28E-2            | 6.69E-2              | 1.2638       | 0.8192      | 1.9497      | 3.05E-1            | 2.13E-1              |
| BNC2         | 9   | 16,779,878  | rs4961760  | intensive    | 0.8045       | 0.4595      | 1.4086      | 4.34E-1            | 4.41E-1              | 0.3193       | 0.0777      | 1.3125      | 5.68E-2            | 8.42E-2              |
| BNC2         | 9   | 16,779,878  | rs4961760  | conventional | 1.8005       | 1.2806      | 2.5315      | 1.57E-3            | 2.95E-3              | 1.8125       | 1.1659      | 2.8176      | 1.33E-2            | 3.85E-2              |
| BNC2         | 9   | 16,779,878  | rs4961760  | combined     | 1.2938       | 0.9666      | 1.7318      | 9.35E-2            | 7.61E-2              | 1.2338       | 0.8191      | 1.8584      | 3.28E-1            | 3.03E-1              |
| BNC2         | 9   | 16,779,436  | rs6475082  | intensive    | 0.8045       | 0.4595      | 1.4086      | 4.34E-1            | 4.41E-1              | 0.3193       | 0.0777      | 1.3125      | 5.68E-2            | 8.42E-2              |
| BNC2         | 9   | 16,779,436  | rs6475082  | conventional | 1.8171       | 1.2923      | 2.555       | 1.35E-3            | 2.72E-3              | 1.826        | 1.1745      | 2.8387      | 1.23E-2            | 3.80E-2              |
| BNC2         | 9   | 16,779,436  | rs6475082  | combined     | 1.2974       | 0.9693      | 1.7365      | 9.01E-2            | 7.39E-2              | 1.2369       | 0.8212      | 1.8629      | 3.22E-1            | 3.01E-1              |
| BNC2         | 9   | 16,779,024  | rs10810632 | intensive    | 0.8045       | 0.4595      | 1.4086      | 4.34E-1            | 4.41E-1              | 0.3193       | 0.0777      | 1.3125      | 5.68E-2            | 8.42E-2              |
| BNC2         | 9   | 16,779,024  | rs10810632 | conventional | 1.8455       | 1.3128      | 2.5943      | 1.02E-3            | 2.01E-3              | 1.8498       | 1.1899      | 2.8755      | 1.07E-2            | 3.41E-2              |
| BNC2         | 9   | 16,779,024  | rs10810632 | combined     | 1.3085       | 0.9777      | 1.7511      | 8.03E-2            | 6.74E-2              | 1.2438       | 0.826       | 1.8729      | 3.10E-1            | 2.94E-1              |
| SORCS1       | 10  | 108,113,589 | rs1358030  | intensive    | 1.2493       | 0.9347      | 1.6697      | 1.36E-1            | 6.01E-2              | 1.0033       | 0.6138      | 1.6399      | 9.90E-1            | 9.18E-1              |
| SORCS1       | 10  | 108,113,589 | rs1358030  | conventional | 1.2564       | 1.0087      | 1.565       | 4.29E-2            | 4.22E-2              | 1.3942       | 1.0413      | 1.8667      | 2.66E-2            | 6.03E-2              |
| SORCS1       | 10  | 108,113,589 | rs1358030  | combined     | 1.2617       | 1.0628      | 1.4979      | 8.47E-3            | 1.11E-2              | 1.2355       | 0.9708      | 1.5723      | 8.81E-2            | 1.52E-1              |
| GSC          | 14  | 94,407,241  | rs8007115  | intensive    | 0.8798       | 0.6209      | 1.2468      | 4.66E-1            | 5.27E-1              | 0.77         | 0.4186      | 1.4162      | 3.88E-1            | 5.65E-1              |
| GSC          | 14  | 94,407,241  | rs8007115  | conventional | 1.0938       | 0.8498      | 1.4078      | 4.89E-1            | 8.11E-1              | 1.0123       | 0.7223      | 1.4187      | 9.44E-1            | 5.17E-1              |
| GSC          | 14  | 94,407,241  | rs8007115  | combined     | 0.9888       | 0.8084      | 1.2095      | 9.13E-1            | 7.98E-1              | 0.9275       | 0.6931      | 1.2411      | 6.10E-1            | 6.79E-1              |
| GSC          | 14  | 94,405,244  | rs11160219 | intensive    | 0.9024       | 0.6387      | 1.275       | 5.57E-1            | 6.25E-1              | 0.8332       | 0.4601      | 1.5087      | 5.40E-1            | 6.67E-1              |
| GSC          | 14  | 94,405,244  | rs11160219 | conventional | 1.0684       | 0.8315      | 1.3729      | 6.07E-1            | 9.20E-1              | 0.9866       | 0.7039      | 1.3829      | 9.37E-1            | 4.58E-1              |
| GSC          | 14  | 94,405,244  | rs11160219 | combined     | 0.9836       | 0.8048      | 1.2022      | 8.72E-1            | 8.18E-1              | 0.9219       | 0.6895      | 1.2327      | 5.81E-1            | 6.98E-1              |
| GSC          | 14  | 94,375,765  | rs11624318 | intensive    | 1.0109       | 0.7093      | 1.4408      | 9.52E-1            | 6.29E-1              | 0.7649       | 0.4017      | 1.4565      | 4.00E-1            | 6.05E-1              |
| GSC          | 14  | 94,375,765  | rs11624318 | conventional | 0.9463       | 0.7272      | 1.2314      | 6.80E-1            | 2.98E-1              | 1.0186       | 0.7271      | 1.4269      | 9.15E-1            | 6.52E-1              |
| GSC          | 14  | 94,375,765  | rs11624318 | combined     | 0.9722       | 0.7877      | 1.1999      | 7.92E-1            | 6.80E-1              | 0.9602       | 0.7128      | 1.2935      | 7.89E-1            | 8.31E-1              |
| WDR72        | 15  | 51,296,486  | rs482541   | intensive    | 1.3587       | 0.8851      | 2.0858      | 1.76E-1            | 3.65E-2              | 1.0248       | 0.469       | 2.2389      | 9.51E-1            | 5.98E-1              |
| WDR72        | 15  | 51,296,486  | rs482541   | conventional | 0.9481       | 0.6674      | 1.3468      | 7.64E-1            | 8.60E-1              | 0.7382       | 0.4407      | 1.2367      | 2.30E-1            | 3.45E-1              |
| WDR72        | 15  | 51,296,486  | rs482541   | combined     | 1.0915       | 0.8338      | 1.4288      | 5.28E-1            | 1.57E-1              | 0.8038       | 0.524       | 1.2329      | 3.02E-1            | 9.20E-1              |
| WDR72        | 15  | 51,295,884  | rs566369   | intensive    | 1.3587       | 0.8851      | 2.0858      | 1.76E-1            | 3.65E-2              | 1.0248       | 0.469       | 2.2389      | 9.51E-1            | 5.98E-1              |
| WDR72        | 15  | 51,295,884  | rs566369   | conventional | 0.9481       | 0.6674      | 1.3468      | 7.64E-1            | 8.60E-1              | 0.7382       | 0.4407      | 1.2367      | 2.30E-1            | 3.45E-1              |
| WDR72        | 15  | 51,295,884  | rs566369   | combined     | 1.0915       | 0.8338      | 1.4288      | 5.28E-1            | 1.57E-1              | 0.8038       | 0.524       | 1.2329      | 3.02E-1            | 9.20E-1              |
| WDR72        | 15  | 51,291,964  | rs690271   | intensive    | 1.3587       | 0.8851      | 2.0858      | 1.76E-1            | 3.65E-2              | 1.0248       | 0.469       | 2.2389      | 9.51E-1            | 5.98E-1              |
| WDR72        | 15  | 51,291,964  | rs690271   | conventional | 0.95         | 0.6688      | 1.3494      | 7.73E-1            | 8.66E-1              | 0.7396       | 0.4416      | 1.2388      | 2.32E-1            | 3.45E-1              |
| WDR72        | 15  | 51,291,964  | rs690271   | combined     | 1.0922       | 0.8343      | 1.4297      | 5.26E-1            | 1.56E-1              | 0.8042       | 0.5243      | 1.2336      | 3.03E-1            | 9.21E-1              |
| WDR72        | 15  | 51,291,924  | rs572221   | intensive    | 1.3659       | 0.89        | 2.0962      | 1.69E-1            | 3.57E-2              | 1.0263       | 0.4699      | 2.2415      | 9.48E-1            | 5.99E-1              |
| WDR72        | 15  | 51,291,924  | rs572221   | conventional | 0.95         | 0.6688      | 1.3494      | 7.73E-1            | 8.66E-1              | 0.7396       | 0.4416      | 1.2388      | 2.32E-1            | 3.45E-1              |
| WDR72        | 15  | 51,291,924  | rs572221   | combined     | 1.0947       | 0.8363      | 1.4328      | 5.15E-1            | 1.55E-1              | 0.8052       | 0.525       | 1.235       | 3.06E-1            | 9.16E-1              |
| WDR72        | 15  | 51,277,554  | rs493218   | intensive    | 1.3587       | 0.8851      | 2.0858      | 1.76E-1            | 3.65E-2              | 1.0412       | 0.4767      | 2.2737      | 9.20E-1            | 5.70E-1              |
| WDR72        | 15  | 51,277,554  | rs493218   | conventional | 0.9247       | 0.6483      | 1.319       | 6.63E-1            | 7.82E-1              | 0.6959       | 0.4093      | 1.1831      | 1.59E-1            | 2.96E-1              |
| WDR72        | 15  | 51,277,554  | rs493218   | combined     | 1.0748       | 0.8196      | 1.4095      | 6.05E-1            | 1.88E-1              | 0.7759       | 0.5016      | 1.2002      | 2.37E-1            | 8.24E-1              |

**Supplementary Table 4.** Association results of top 13 SNPs for HbA1c in DCCT with coronary calcium measured during EDIC.

| nearest gene | CHR | pos         | snp        | GROUP        | M1 p value | M2 p value | M3 p value | M4 p value | M1 parameter estimate | M1 SE | M2 parameter estimate | M2 SE | M3 parameter estimate | M3 SE | M4 parameter estimate | M4 SE |
|--------------|-----|-------------|------------|--------------|------------|------------|------------|------------|-----------------------|-------|-----------------------|-------|-----------------------|-------|-----------------------|-------|
| BNC2         | 9   | 16,779,024  | rs10810632 | conventional | 0.24424    | 0.23373    | 0.37679    | 0.30206    | 0.89                  | 0.76  | 0.81                  | 0.68  | 0.56                  | 0.63  | 0.64                  | 0.62  |
| BNC2         | 9   | 16,779,024  | rs10810632 | intensive    | 0.13643    | 0.0379     | 0.01862    | 0.0186     | 0.99                  | 0.66  | 1.25                  | 0.6   | 1.34                  | 0.57  | 1.34                  | 0.57  |
| BNC2         | 9   | 16,779,024  | rs10810632 | COMBINED     | 0.06475    | 0.04556    | 0.07268    | 0.04541    | 0.93                  | 0.5   | 0.9                   | 0.45  | 0.76                  | 0.42  | 0.84                  | 0.42  |
| BNC2         | 9   | 16,779,436  | rs6475082  | conventional | 0.2776     | 0.26097    | 0.39401    | 0.31815    | 0.83                  | 0.76  | 0.76                  | 0.67  | 0.54                  | 0.63  | 0.62                  | 0.62  |
| BNC2         | 9   | 16,779,436  | rs6475082  | intensive    | 0.13643    | 0.0379     | 0.01862    | 0.0186     | 0.99                  | 0.66  | 1.25                  | 0.6   | 1.34                  | 0.57  | 1.34                  | 0.57  |
| BNC2         | 9   | 16,779,436  | rs6475082  | COMBINED     | 0.07264    | 0.05217    | 0.07922    | 0.05034    | 0.9                   | 0.5   | 0.87                  | 0.45  | 0.74                  | 0.42  | 0.82                  | 0.42  |
| BNC2         | 9   | 16,779,878  | rs4961760  | conventional | 0.30866    | 0.30326    | 0.42986    | 0.35022    | 0.78                  | 0.76  | 0.7                   | 0.67  | 0.5                   | 0.63  | 0.58                  | 0.61  |
| BNC2         | 9   | 16,779,878  | rs4961760  | intensive    | 0.13643    | 0.0379     | 0.01862    | 0.0186     | 0.99                  | 0.66  | 1.25                  | 0.6   | 1.34                  | 0.57  | 1.34                  | 0.57  |
| BNC2         | 9   | 16,779,878  | rs4961760  | COMBINED     | 0.07986    | 0.05846    | 0.0845     | 0.05391    | 0.88                  | 0.5   | 0.85                  | 0.45  | 0.73                  | 0.42  | 0.81                  | 0.42  |
| BNC2         | 9   | 16,791,850  | rs2254193  | conventional | 0.2438     | 0.25557    | 0.37916    | 0.30716    | 0.95                  | 0.81  | 0.82                  | 0.72  | 0.59                  | 0.67  | 0.68                  | 0.66  |
| BNC2         | 9   | 16,791,850  | rs2254193  | intensive    | 0.31739    | 0.09241    | 0.05748    | 0.05338    | 0.7                   | 0.7   | 1.07                  | 0.64  | 1.15                  | 0.6   | 1.17                  | 0.6   |
| BNC2         | 9   | 16,791,850  | rs2254193  | COMBINED     | 0.13581    | 0.08898    | 0.15687    | 0.10153    | 0.8                   | 0.53  | 0.81                  | 0.48  | 0.64                  | 0.45  | 0.73                  | 0.45  |
| SORCS1       | 10  | 108,113,589 | rs1358030  | conventional | 0.1864     | 0.1295     | 0.0276     | 0.0198     | 0.56                  | 0.43  | 0.58                  | 0.38  | 0.8                   | 0.36  | 0.83                  | 0.36  |
| SORCS1       | 10  | 108,113,589 | rs1358030  | intensive    | 0.1877     | 0.107      | 0.0761     | 0.0502     | 0.53                  | 0.4   | 0.59                  | 0.37  | 0.62                  | 0.35  | 0.68                  | 0.35  |
| SORCS1       | 10  | 108,113,589 | rs1358030  | COMBINED     | 0.0608     | 0.0282     | 0.0095     | 0.0043     | 0.55                  | 0.29  | 0.58                  | 0.26  | 0.65                  | 0.25  | 0.71                  | 0.25  |
| GSC          | 14  | 94,375,765  | rs11624318 | conventional | 0.0338     | 0.06319    | 0.01727    | 0.01987    | 1.04                  | 0.49  | 0.81                  | 0.44  | 0.95                  | 0.4   | 0.93                  | 0.4   |
| GSC          | 14  | 94,375,765  | rs11624318 | intensive    | 0.56384    | 0.24589    | 0.29317    | 0.21918    | -0.28                 | 0.48  | -0.52                 | 0.45  | -0.45                 | 0.42  | -0.52                 | 0.42  |
| GSC          | 14  | 94,375,765  | rs11624318 | COMBINED     | 0.25733    | 0.49085    | 0.21342    | 0.26365    | 0.39                  | 0.34  | 0.21                  | 0.31  | 0.36                  | 0.29  | 0.33                  | 0.29  |
| GSC          | 14  | 94,405,244  | rs11160219 | conventional | 0.39221    | 0.3388     | 0.16105    | 0.21132    | 0.41                  | 0.48  | 0.42                  | 0.44  | 0.59                  | 0.42  | 0.52                  | 0.41  |
| GSC          | 14  | 94,405,244  | rs11160219 | intensive    | 0.83883    | 0.71476    | 0.48678    | 0.43876    | -0.09                 | 0.46  | -0.15                 | 0.42  | -0.28                 | 0.4   | -0.31                 | 0.4   |
| GSC          | 14  | 94,405,244  | rs11160219 | COMBINED     | 0.64742    | 0.76645    | 0.50959    | 0.63954    | 0.15                  | 0.33  | 0.09                  | 0.3   | 0.19                  | 0.29  | 0.13                  | 0.29  |
| GSC          | 14  | 94,407,241  | rs8007115  | conventional | 0.39029    | 0.34282    | 0.15165    | 0.19768    | 0.42                  | 0.48  | 0.42                  | 0.45  | 0.6                   | 0.42  | 0.54                  | 0.42  |
| GSC          | 14  | 94,407,241  | rs8007115  | intensive    | 0.82192    | 0.69159    | 0.51525    | 0.44594    | -0.1                  | 0.46  | -0.17                 | 0.42  | -0.26                 | 0.4   | -0.3                  | 0.4   |
| GSC          | 14  | 94,407,241  | rs8007115  | COMBINED     | 0.65577    | 0.78948    | 0.4696     | 0.59935    | 0.15                  | 0.33  | 0.08                  | 0.31  | 0.21                  | 0.29  | 0.15                  | 0.29  |
| WDR72        | 15  | 51,277,554  | rs493218   | conventional | 0.61858    | 0.70967    | 0.52761    | 0.52509    | -0.33                 | 0.67  | -0.22                 | 0.6   | 0.35                  | 0.56  | 0.36                  | 0.56  |
| WDR72        | 15  | 51,277,554  | rs493218   | intensive    | 0.14821    | 0.15828    | 0.03032    | 0.09229    | 0.87                  | 0.6   | 0.78                  | 0.55  | 1.15                  | 0.53  | 0.88                  | 0.52  |
| WDR72        | 15  | 51,277,554  | rs493218   | COMBINED     | 0.49992    | 0.60516    | 0.114      | 0.16924    | 0.3                   | 0.45  | 0.21                  | 0.41  | 0.61                  | 0.39  | 0.53                  | 0.38  |
| WDR72        | 15  | 51,291,924  | rs572221   | conventional | 0.72723    | 0.77537    | 0.54209    | 0.54754    | -0.23                 | 0.66  | -0.17                 | 0.6   | 0.34                  | 0.56  | 0.34                  | 0.56  |
| WDR72        | 15  | 51,291,924  | rs572221   | intensive    | 0.15599    | 0.15476    | 0.02977    | 0.09129    | 0.86                  | 0.6   | 0.79                  | 0.55  | 1.16                  | 0.53  | 0.88                  | 0.52  |
| WDR72        | 15  | 51,291,924  | rs572221   | COMBINED     | 0.44957    | 0.56355    | 0.11907    | 0.17809    | 0.34                  | 0.45  | 0.24                  | 0.41  | 0.6                   | 0.38  | 0.52                  | 0.38  |
| WDR72        | 15  | 51,291,964  | rs690271   | conventional | 0.72723    | 0.77537    | 0.54209    | 0.54754    | -0.23                 | 0.66  | -0.17                 | 0.6   | 0.34                  | 0.56  | 0.34                  | 0.56  |
| WDR72        | 15  | 51,291,964  | rs690271   | intensive    | 0.16647    | 0.16637    | 0.0326     | 0.09809    | 0.83                  | 0.6   | 0.77                  | 0.55  | 1.14                  | 0.53  | 0.86                  | 0.52  |
| WDR72        | 15  | 51,291,964  | rs690271   | COMBINED     | 0.46457    | 0.5825     | 0.12452    | 0.18581    | 0.33                  | 0.45  | 0.22                  | 0.41  | 0.59                  | 0.38  | 0.51                  | 0.38  |
| WDR72        | 15  | 51,295,884  | rs566369   | conventional | 0.71659    | 0.74533    | 0.56241    | 0.56688    | -0.24                 | 0.66  | -0.19                 | 0.6   | 0.32                  | 0.56  | 0.32                  | 0.56  |
| WDR72        | 15  | 51,295,884  | rs566369   | intensive    | 0.16647    | 0.16637    | 0.0326     | 0.09809    | 0.83                  | 0.6   | 0.77                  | 0.55  | 1.14                  | 0.53  | 0.86                  | 0.52  |
| WDR72        | 15  | 51,295,884  | rs566369   | COMBINED     | 0.4706     | 0.59601    | 0.1278     | 0.19031    | 0.32                  | 0.45  | 0.22                  | 0.41  | 0.59                  | 0.38  | 0.5                   | 0.38  |
| WDR72        | 15  | 51,296,486  | rs482541   | conventional | 0.71659    | 0.74533    | 0.56241    | 0.56688    | -0.24                 | 0.66  | -0.19                 | 0.6   | 0.32                  | 0.56  | 0.32                  | 0.56  |
| WDR72        | 15  | 51,296,486  | rs482541   | intensive    | 0.16647    | 0.16637    | 0.0326     | 0.09809    | 0.83                  | 0.6   | 0.77                  | 0.55  | 1.14                  | 0.53  | 0.86                  | 0.52  |
| WDR72        | 15  | 51,296,486  | rs482541   | COMBINED     | 0.4706     | 0.59601    | 0.1278     | 0.19031    | 0.32                  | 0.45  | 0.22                  | 0.41  | 0.59                  | 0.38  | 0.5                   | 0.38  |

**Supplementary Table 5.** Association results of top 13 SNPs for HbA1c in DCCT with hypoglycemia during DCCT.

| nearest gene | chr | pos         | snp        | GROUP        | ordinal uv def1=coma/seizure |            |          |          | ordinal a1c def1 |            |          |          | ordinal uv def2=requiring assistance |            |          |          | ORDINAL DEF2 WITH A1c |            |          |          |
|--------------|-----|-------------|------------|--------------|------------------------------|------------|----------|----------|------------------|------------|----------|----------|--------------------------------------|------------|----------|----------|-----------------------|------------|----------|----------|
|              |     |             |            |              | ProbChisq                    | Odds Ratio | Lower CL | Upper CL | ProbChisq        | Odds Ratio | Lower CL | Upper CL | ProbChisq                            | Odds Ratio | Lower CL | Upper CL | ProbChisq             | Odds Ratio | Lower CL | Upper CL |
| BNC2         | 9   | 16,779,024  | rs10810632 | INTENSIVE    | 5.8E-01                      | 0.89       | 0.60     | 1.33     | 6.1E-01          | 0.90       | 0.60     | 1.35     | 9.4E-01                              | 1.02       | 0.70     | 1.47     | 9.4E-01               | 1.01       | 0.70     | 1.47     |
| BNC2         | 9   | 16,779,024  | rs10810632 | CONVENTIONAL | 9.9E-02                      | 0.59       | 0.32     | 1.10     | 4.9E-01          | 0.80       | 0.42     | 1.51     | 4.4E-03                              | 0.49       | 0.30     | 0.80     | 1.0E-01               | 0.66       | 0.39     | 1.09     |
| BNC2         | 9   | 16,779,024  | rs10810632 | COMBINED     | 2.5E-01                      | 0.83       | 0.60     | 1.14     | 3.6E-01          | 0.86       | 0.61     | 1.19     | 2.7E-01                              | 0.86       | 0.65     | 1.13     | 4.2E-01               | 0.89       | 0.67     | 1.18     |
| BNC2         | 9   | 16,779,436  | rs6475082  | INTENSIVE    | 5.8E-01                      | 0.89       | 0.60     | 1.33     | 6.1E-01          | 0.90       | 0.60     | 1.35     | 9.4E-01                              | 1.02       | 0.70     | 1.47     | 9.4E-01               | 1.01       | 0.70     | 1.47     |
| BNC2         | 9   | 16,779,436  | rs6475082  | CONVENTIONAL | 1.5E-01                      | 0.64       | 0.35     | 1.17     | 6.2E-01          | 0.85       | 0.46     | 1.58     | 7.3E-03                              | 0.51       | 0.32     | 0.84     | 1.4E-01               | 0.69       | 0.42     | 1.14     |
| BNC2         | 9   | 16,779,436  | rs6475082  | COMBINED     | 2.9E-01                      | 0.84       | 0.61     | 1.16     | 4.1E-01          | 0.87       | 0.63     | 1.21     | 3.1E-01                              | 0.87       | 0.66     | 1.14     | 4.7E-01               | 0.90       | 0.68     | 1.20     |
| BNC2         | 9   | 16,779,878  | rs4961760  | INTENSIVE    | 5.8E-01                      | 0.89       | 0.60     | 1.33     | 6.1E-01          | 0.90       | 0.60     | 1.35     | 9.4E-01                              | 1.02       | 0.70     | 1.47     | 9.4E-01               | 1.01       | 0.70     | 1.47     |
| BNC2         | 9   | 16,779,878  | rs4961760  | CONVENTIONAL | 1.4E-01                      | 0.64       | 0.35     | 1.15     | 5.9E-01          | 0.84       | 0.46     | 1.56     | 1.1E-02                              | 0.54       | 0.34     | 0.87     | 2.0E-01               | 0.73       | 0.44     | 1.18     |
| BNC2         | 9   | 16,779,878  | rs4961760  | COMBINED     | 2.7E-01                      | 0.84       | 0.60     | 1.15     | 3.9E-01          | 0.87       | 0.62     | 1.20     | 3.5E-01                              | 0.88       | 0.67     | 1.15     | 5.3E-01               | 0.91       | 0.69     | 1.21     |
| BNC2         | 9   | 16,791,850  | rs2254193  | INTENSIVE    | 5.4E-01                      | 0.88       | 0.58     | 1.34     | 5.5E-01          | 0.88       | 0.58     | 1.34     | 5.5E-01                              | 0.89       | 0.60     | 1.31     | 5.5E-01               | 0.89       | 0.60     | 1.31     |
| BNC2         | 9   | 16,791,850  | rs2254193  | CONVENTIONAL | 1.1E-01                      | 0.58       | 0.30     | 1.14     | 5.2E-01          | 0.80       | 0.40     | 1.59     | 4.7E-03                              | 0.46       | 0.26     | 0.79     | 9.8E-02               | 0.63       | 0.36     | 1.09     |
| BNC2         | 9   | 16,791,850  | rs2254193  | COMBINED     | 2.8E-01                      | 0.83       | 0.58     | 1.17     | 3.9E-01          | 0.86       | 0.60     | 1.22     | 1.3E-01                              | 0.80       | 0.60     | 1.07     | 2.2E-01               | 0.82       | 0.61     | 1.12     |
| SORCS1       | 10  | 108,113,589 | rs1358030  | INTENSIVE    | 6.4E-01                      | 1.05       | 0.85     | 1.31     | 8.6E-01          | 1.02       | 0.82     | 1.27     | 2.8E-01                              | 0.89       | 0.72     | 1.10     | 3.0E-01               | 0.89       | 0.72     | 1.10     |
| SORCS1       | 10  | 108,113,589 | rs1358030  | CONVENTIONAL | 9.7E-04                      | 0.60       | 0.44     | 0.81     | 3.3E-02          | 0.71       | 0.52     | 0.97     | 1.4E-04                              | 0.63       | 0.50     | 0.80     | 1.8E-02               | 0.75       | 0.58     | 0.95     |
| SORCS1       | 10  | 108,113,589 | rs1358030  | COMBINED     | 7.2E-02                      | 0.85       | 0.72     | 1.01     | 3.9E-01          | 0.93       | 0.78     | 1.10     | 5.5E-04                              | 0.77       | 0.66     | 0.89     | 7.0E-02               | 0.87       | 0.74     | 1.01     |
| GSC          | 14  | 94,375,765  | rs11624318 | INTENSIVE    | 5.1E-01                      | 0.91       | 0.70     | 1.19     | 6.0E-01          | 0.93       | 0.71     | 1.22     | 5.2E-01                              | 0.92       | 0.72     | 1.18     | 5.1E-01               | 0.92       | 0.71     | 1.18     |
| GSC          | 14  | 94,375,765  | rs11624318 | CONVENTIONAL | 7.3E-01                      | 0.94       | 0.67     | 1.32     | 5.2E-01          | 0.89       | 0.64     | 1.26     | 5.9E-01                              | 0.93       | 0.71     | 1.22     | 3.8E-01               | 0.88       | 0.67     | 1.16     |
| GSC          | 14  | 94,375,765  | rs11624318 | COMBINED     | 4.3E-01                      | 0.92       | 0.75     | 1.13     | 2.7E-01          | 0.89       | 0.72     | 1.10     | 3.9E-01                              | 0.93       | 0.77     | 1.10     | 1.6E-01               | 0.88       | 0.73     | 1.05     |
| GSC          | 14  | 94,405,244  | rs11160219 | INTENSIVE    | 9.6E-01                      | 0.99       | 0.77     | 1.28     | 9.2E-01          | 1.01       | 0.79     | 1.31     | 6.5E-01                              | 1.06       | 0.83     | 1.34     | 6.0E-01               | 1.07       | 0.84     | 1.36     |
| GSC          | 14  | 94,405,244  | rs11160219 | CONVENTIONAL | 7.7E-01                      | 1.05       | 0.76     | 1.44     | 7.4E-01          | 0.95       | 0.68     | 1.31     | 8.8E-01                              | 1.02       | 0.79     | 1.32     | 5.7E-01               | 0.93       | 0.71     | 1.21     |
| GSC          | 14  | 94,405,244  | rs11160219 | COMBINED     | 7.7E-01                      | 1.03       | 0.85     | 1.25     | 8.3E-01          | 0.98       | 0.80     | 1.19     | 4.1E-01                              | 1.07       | 0.91     | 1.27     | 9.9E-01               | 1.00       | 0.84     | 1.19     |
| GSC          | 14  | 94,407,241  | rs8007115  | INTENSIVE    | 9.6E-01                      | 1.01       | 0.78     | 1.30     | 8.3E-01          | 1.03       | 0.80     | 1.33     | 5.7E-01                              | 1.07       | 0.84     | 1.37     | 5.2E-01               | 1.08       | 0.85     | 1.38     |
| GSC          | 14  | 94,407,241  | rs8007115  | CONVENTIONAL | 8.9E-01                      | 1.02       | 0.74     | 1.41     | 6.4E-01          | 0.92       | 0.67     | 1.28     | 8.4E-01                              | 1.03       | 0.79     | 1.33     | 6.3E-01               | 0.94       | 0.72     | 1.22     |
| GSC          | 14  | 94,407,241  | rs8007115  | COMBINED     | 8.1E-01                      | 1.02       | 0.84     | 1.25     | 7.9E-01          | 0.97       | 0.80     | 1.19     | 3.7E-01                              | 1.08       | 0.91     | 1.28     | 9.3E-01               | 1.01       | 0.84     | 1.20     |
| WDR72        | 15  | 51,277,554  | rs493218   | INTENSIVE    | 7.7E-01                      | 0.95       | 0.67     | 1.34     | 8.6E-01          | 1.03       | 0.73     | 1.47     | 8.7E-01                              | 1.03       | 0.74     | 1.42     | 9.5E-01               | 1.01       | 0.73     | 1.41     |
| WDR72        | 15  | 51,277,554  | rs493218   | CONVENTIONAL | 5.5E-01                      | 0.87       | 0.55     | 1.37     | 6.6E-01          | 0.90       | 0.57     | 1.43     | 6.6E-01                              | 1.08       | 0.76     | 1.53     | 4.5E-01               | 1.15       | 0.80     | 1.63     |
| WDR72        | 15  | 51,277,554  | rs493218   | COMBINED     | 6.4E-01                      | 0.94       | 0.72     | 1.23     | 3.4E-01          | 0.87       | 0.66     | 1.15     | 6.2E-01                              | 1.06       | 0.84     | 1.33     | 8.2E-01               | 0.97       | 0.77     | 1.24     |
| WDR72        | 15  | 51,291,924  | rs572221   | INTENSIVE    | 7.4E-01                      | 0.94       | 0.67     | 1.33     | 8.8E-01          | 1.03       | 0.72     | 1.46     | 8.8E-01                              | 1.03       | 0.74     | 1.42     | 9.6E-01               | 1.01       | 0.73     | 1.40     |
| WDR72        | 15  | 51,291,924  | rs572221   | CONVENTIONAL | 5.0E-01                      | 0.86       | 0.54     | 1.35     | 5.9E-01          | 0.88       | 0.56     | 1.40     | 7.6E-01                              | 1.06       | 0.75     | 1.49     | 5.5E-01               | 1.11       | 0.78     | 1.59     |
| WDR72        | 15  | 51,291,924  | rs572221   | COMBINED     | 5.9E-01                      | 0.93       | 0.71     | 1.22     | 3.0E-01          | 0.87       | 0.66     | 1.14     | 6.8E-01                              | 1.05       | 0.83     | 1.32     | 7.6E-01               | 0.96       | 0.76     | 1.22     |
| WDR72        | 15  | 51,291,964  | rs690271   | INTENSIVE    | 7.2E-01                      | 0.94       | 0.66     | 1.32     | 9.1E-01          | 1.02       | 0.72     | 1.45     | 8.9E-01                              | 1.02       | 0.74     | 1.41     | 9.7E-01               | 1.01       | 0.72     | 1.40     |
| WDR72        | 15  | 51,291,964  | rs690271   | CONVENTIONAL | 5.0E-01                      | 0.86       | 0.54     | 1.35     | 5.9E-01          | 0.88       | 0.56     | 1.40     | 7.6E-01                              | 1.06       | 0.75     | 1.49     | 5.5E-01               | 1.11       | 0.78     | 1.59     |
| WDR72        | 15  | 51,291,964  | rs690271   | COMBINED     | 5.8E-01                      | 0.93       | 0.71     | 1.21     | 2.9E-01          | 0.86       | 0.66     | 1.13     | 6.7E-01                              | 1.05       | 0.84     | 1.32     | 7.4E-01               | 0.96       | 0.76     | 1.22     |
| WDR72        | 15  | 51,295,884  | rs566369   | INTENSIVE    | 7.2E-01                      | 0.94       | 0.66     | 1.32     | 9.1E-01          | 1.02       | 0.72     | 1.45     | 8.9E-01                              | 1.02       | 0.74     | 1.41     | 9.7E-01               | 1.01       | 0.72     | 1.40     |
| WDR72        | 15  | 51,295,884  | rs566369   | CONVENTIONAL | 5.0E-01                      | 0.85       | 0.54     | 1.34     | 5.9E-01          | 0.88       | 0.55     | 1.40     | 7.3E-01                              | 1.06       | 0.75     | 1.50     | 5.3E-01               | 1.12       | 0.79     | 1.60     |
| WDR72        | 15  | 51,295,884  | rs566369   | COMBINED     | 5.7E-01                      | 0.93       | 0.71     | 1.21     | 2.9E-01          | 0.86       | 0.66     | 1.13     | 6.6E-01                              | 1.05       | 0.84     | 1.32     | 7.5E-01               | 0.96       | 0.76     | 1.22     |
| WDR72        | 15  | 51,296,486  | rs482541   | INTENSIVE    | 7.2E-01                      | 0.94       | 0.66     | 1.32     | 9.1E-01          | 1.02       | 0.72     | 1.45     | 8.9E-01                              | 1.02       | 0.74     | 1.41     | 9.7E-01               | 1.01       | 0.72     | 1.40     |
| WDR72        | 15  | 51,296,486  | rs482541   | CONVENTIONAL | 5.0E-01                      | 0.85       | 0.54     | 1.34     | 5.9E-01          | 0.88       | 0.55     | 1.40     | 7.3E-01                              | 1.06       | 0.75     | 1.50     | 5.3E-01               | 1.12       | 0.79     | 1.60     |
| WDR72        | 15  | 51,296,486  | rs482541   | COMBINED     | 5.7E-01                      | 0.93       | 0.71     | 1.21     | 2.9E-01          | 0.86       | 0.66     | 1.13     | 6.6E-01                              | 1.05       | 0.84     | 1.32     | 7.5E-01               | 0.96       | 0.76     | 1.22     |

**Supplementary Table 6.** Association results of top 13 SNPs for HbA1c in DCCT with retinal complications in DCCT/EDIC.

| nearest gene | chr | pos         | snp        | trx          | mild retinal |           |           |                 |                 | csme |           |           |          |          | severe retinal |           |           |            |            |
|--------------|-----|-------------|------------|--------------|--------------|-----------|-----------|-----------------|-----------------|------|-----------|-----------|----------|----------|----------------|-----------|-----------|------------|------------|
|              |     |             |            |              | hr0          | hr_lowci0 | hr_uppci0 | mild retinal_uv | mild retinal_mv | hr1  | hr_lowci1 | hr_uppci1 | csme_uv  | csme_mv  | hr2            | hr_lowci2 | hr_uppci2 | sev ret_uv | sev ret_mv |
| BNC2         | 9   | 16,779,024  | rs10810632 | intensive    | 1.02         | 0.77      | 1.35      | 9.01E-01        | 8.05E-01        | 0.97 | 0.56      | 1.69      | 9.19E-01 | 9.82E-01 | 0.61           | 0.3       | 1.25      | 1.49E-01   | 1.89E-01   |
| BNC2         | 9   | 16,779,024  | rs10810632 | conventional | 1.73         | 1.31      | 2.27      | 1.99E-04        | 6.79E-06        | 1.87 | 1.31      | 2.67      | 1.36E-03 | 1.54E-03 | 1.83           | 1.28      | 2.62      | 1.69E-03   | 2.04E-03   |
| BNC2         | 9   | 16,779,024  | rs10810632 | combined     | 1.15         | 0.95      | 1.4       | 1.52E-01        | 2.83E-01        | 1.36 | 1.01      | 1.83      | 4.81E-02 | 3.93E-02 | 1.19           | 0.88      | 1.62      | 2.72E-01   | 1.99E-01   |
| BNC2         | 9   | 16,779,436  | rs6475082  | combined     | 1.15         | 0.95      | 1.39      | 1.63E-01        | 2.71E-01        | 1.35 | 1.01      | 1.82      | 5.36E-02 | 4.11E-02 | 1.18           | 0.87      | 1.61      | 2.99E-01   | 2.08E-01   |
| BNC2         | 9   | 16,779,436  | rs6475082  | conventional | 1.68         | 1.28      | 2.2       | 3.82E-04        | 8.28E-06        | 1.83 | 1.28      | 2.62      | 1.89E-03 | 1.95E-03 | 1.79           | 1.25      | 2.56      | 2.51E-03   | 2.67E-03   |
| BNC2         | 9   | 16,779,436  | rs6475082  | intensive    | 1.02         | 0.77      | 1.35      | 9.01E-01        | 8.05E-01        | 0.97 | 0.56      | 1.69      | 9.19E-01 | 9.82E-01 | 0.61           | 0.3       | 1.25      | 1.49E-01   | 1.89E-01   |
| BNC2         | 9   | 16,779,878  | rs4961760  | intensive    | 1.02         | 0.77      | 1.35      | 9.01E-01        | 8.05E-01        | 0.97 | 0.56      | 1.69      | 9.19E-01 | 9.82E-01 | 0.61           | 0.3       | 1.25      | 1.49E-01   | 1.89E-01   |
| BNC2         | 9   | 16,779,878  | rs4961760  | conventional | 1.63         | 1.24      | 2.14      | 7.45E-04        | 2.23E-05        | 1.81 | 1.27      | 2.59      | 2.22E-03 | 2.35E-03 | 1.78           | 1.25      | 2.54      | 2.72E-03   | 2.84E-03   |
| BNC2         | 9   | 16,779,878  | rs4961760  | combined     | 1.14         | 0.94      | 1.38      | 1.82E-01        | 3.02E-01        | 1.35 | 1         | 1.82      | 5.59E-02 | 4.29E-02 | 1.18           | 0.87      | 1.61      | 3.03E-01   | 2.10E-01   |
| BNC2         | 9   | 16,791,850  | rs2254193  | intensive    | 1.06         | 0.79      | 1.42      | 7.03E-01        | 9.70E-01        | 1.02 | 0.57      | 1.82      | 9.41E-01 | 9.15E-01 | 0.8            | 0.4       | 1.58      | 5.04E-01   | 5.35E-01   |
| BNC2         | 9   | 16,791,850  | rs2254193  | conventional | 1.54         | 1.15      | 2.06      | 5.93E-03        | 2.26E-04        | 1.85 | 1.26      | 2.72      | 3.59E-03 | 6.53E-03 | 1.89           | 1.29      | 2.75      | 2.01E-03   | 2.84E-03   |
| BNC2         | 9   | 16,791,850  | rs2254193  | combined     | 1.13         | 0.92      | 1.39      | 2.41E-01        | 4.04E-01        | 1.35 | 0.99      | 1.86      | 7.14E-02 | 7.53E-02 | 1.28           | 0.93      | 1.76      | 1.44E-01   | 1.27E-01   |
| SORCS1       | 10  | 108,113,589 | rs1358030  | combined     | 1.14         | 1.02      | 1.27      | 1.66E-02        | 2.29E-02        | 1.12 | 0.93      | 1.34      | 2.43E-01 | 3.67E-01 | 1.22           | 1.02      | 1.46      | 3.02E-02   | 3.83E-02   |
| SORCS1       | 10  | 108,113,589 | rs1358030  | conventional | 1.15         | 0.99      | 1.34      | 7.49E-02        | 1.11E-01        | 1.16 | 0.92      | 1.46      | 2.23E-01 | 2.20E-01 | 1.3            | 1.04      | 1.63      | 2.19E-02   | 2.81E-02   |
| SORCS1       | 10  | 108,113,589 | rs1358030  | intensive    | 1.16         | 0.99      | 1.35      | 7.34E-02        | 3.32E-02        | 1.1  | 0.8       | 1.5       | 5.68E-01 | 4.49E-01 | 1.27           | 0.92      | 1.77      | 1.53E-01   | 8.40E-02   |
| GSC          | 14  | 94,375,765  | rs11624318 | intensive    | 1.09         | 0.9       | 1.32      | 3.88E-01        | 1.95E-01        | 0.9  | 0.6       | 1.33      | 5.79E-01 | 9.26E-01 | 0.69           | 0.44      | 1.1       | 1.04E-01   | 2.88E-01   |
| GSC          | 14  | 94,375,765  | rs11624318 | combined     | 0.98         | 0.86      | 1.11      | 7.19E-01        | 5.32E-01        | 1.02 | 0.82      | 1.26      | 8.92E-01 | 9.57E-01 | 0.93           | 0.74      | 1.16      | 5.07E-01   | 5.66E-01   |
| GSC          | 14  | 94,375,765  | rs11624318 | conventional | 0.87         | 0.73      | 1.04      | 1.21E-01        | 7.86E-02        | 1.11 | 0.85      | 1.45      | 4.54E-01 | 4.26E-01 | 1.08           | 0.83      | 1.4       | 5.62E-01   | 6.00E-01   |
| GSC          | 14  | 94,405,244  | rs11160219 | combined     | 0.96         | 0.86      | 1.09      | 5.55E-01        | 6.31E-01        | 0.88 | 0.71      | 1.09      | 2.42E-01 | 1.72E-01 | 1.01           | 0.82      | 1.25      | 9.26E-01   | 9.09E-01   |
| GSC          | 14  | 94,405,244  | rs11160219 | intensive    | 1.13         | 0.94      | 1.35      | 1.91E-01        | 8.70E-02        | 1.12 | 0.78      | 1.59      | 5.46E-01 | 3.80E-01 | 1.01           | 0.69      | 1.49      | 9.56E-01   | 5.66E-01   |
| GSC          | 14  | 94,405,244  | rs11160219 | conventional | 0.81         | 0.68      | 0.96      | 1.14E-02        | 4.77E-03        | 0.8  | 0.6       | 1.06      | 1.11E-01 | 6.05E-02 | 1.1            | 0.85      | 1.42      | 4.61E-01   | 7.60E-01   |
| GSC          | 14  | 94,407,241  | rs8007115  | combined     | 0.96         | 0.85      | 1.09      | 5.29E-01        | 5.46E-01        | 0.87 | 0.7       | 1.08      | 2.10E-01 | 1.24E-01 | 1.01           | 0.82      | 1.25      | 9.13E-01   | 9.36E-01   |
| GSC          | 14  | 94,407,241  | rs8007115  | conventional | 0.82         | 0.69      | 0.97      | 1.86E-02        | 6.88E-03        | 0.79 | 0.59      | 1.05      | 9.16E-02 | 4.78E-02 | 1.1            | 0.86      | 1.42      | 4.50E-01   | 7.46E-01   |
| GSC          | 14  | 94,407,241  | rs8007115  | intensive    | 1.12         | 0.94      | 1.34      | 2.21E-01        | 8.54E-02        | 1.09 | 0.76      | 1.56      | 6.36E-01 | 4.28E-01 | 0.98           | 0.66      | 1.45      | 9.30E-01   | 6.54E-01   |
| WDR72        | 15  | 51,277,554  | rs493218   | intensive    | 0.75         | 0.57      | 0.97      | 2.47E-02        | 1.09E-02        | 0.62 | 0.35      | 1.12      | 9.18E-02 | 7.88E-02 | 0.36           | 0.16      | 0.82      | 4.30E-03   | 5.70E-03   |
| WDR72        | 15  | 51,277,554  | rs493218   | combined     | 0.92         | 0.78      | 1.09      | 3.52E-01        | 2.96E-01        | 0.76 | 0.55      | 1.04      | 7.67E-02 | 1.20E-01 | 0.71           | 0.51      | 0.99      | 3.38E-02   | 7.30E-02   |
| WDR72        | 15  | 51,277,554  | rs493218   | conventional | 1.19         | 0.95      | 1.5       | 1.41E-01        | 1.11E-01        | 0.83 | 0.57      | 1.23      | 3.47E-01 | 4.62E-01 | 0.9            | 0.62      | 1.31      | 5.70E-01   | 8.59E-01   |
| WDR72        | 15  | 51,291,924  | rs572221   | intensive    | 0.76         | 0.58      | 0.98      | 3.14E-02        | 1.27E-02        | 0.62 | 0.34      | 1.11      | 8.53E-02 | 6.85E-02 | 0.36           | 0.16      | 0.81      | 3.80E-03   | 4.58E-03   |
| WDR72        | 15  | 51,291,924  | rs572221   | conventional | 1.2          | 0.96      | 1.51      | 1.18E-01        | 9.01E-02        | 0.83 | 0.56      | 1.22      | 3.24E-01 | 4.39E-01 | 0.87           | 0.6       | 1.27      | 4.56E-01   | 7.54E-01   |
| WDR72        | 15  | 51,291,924  | rs572221   | combined     | 0.94         | 0.79      | 1.11      | 4.35E-01        | 3.49E-01        | 0.75 | 0.54      | 1.03      | 6.55E-02 | 1.04E-01 | 0.69           | 0.5       | 0.97      | 2.38E-02   | 5.70E-02   |
| WDR72        | 15  | 51,291,964  | rs690271   | combined     | 0.93         | 0.78      | 1.1       | 3.87E-01        | 3.26E-01        | 0.75 | 0.54      | 1.03      | 6.38E-02 | 1.03E-01 | 0.69           | 0.5       | 0.97      | 2.33E-02   | 5.69E-02   |
| WDR72        | 15  | 51,291,964  | rs690271   | conventional | 1.2          | 0.96      | 1.51      | 1.18E-01        | 9.01E-02        | 0.83 | 0.56      | 1.22      | 3.24E-01 | 4.39E-01 | 0.87           | 0.6       | 1.27      | 4.56E-01   | 7.54E-01   |
| WDR72        | 15  | 51,291,964  | rs690271   | intensive    | 0.75         | 0.57      | 0.97      | 2.47E-02        | 1.09E-02        | 0.62 | 0.34      | 1.11      | 8.42E-02 | 6.81E-02 | 0.36           | 0.16      | 0.81      | 3.72E-03   | 4.54E-03   |
| WDR72        | 15  | 51,295,884  | rs566369   | combined     | 0.93         | 0.78      | 1.1       | 3.79E-01        | 3.19E-01        | 0.75 | 0.54      | 1.03      | 6.31E-02 | 1.02E-01 | 0.69           | 0.5       | 0.97      | 2.32E-02   | 5.67E-02   |
| WDR72        | 15  | 51,295,884  | rs566369   | conventional | 1.2          | 0.95      | 1.5       | 1.28E-01        | 1.00E-01        | 0.82 | 0.56      | 1.22      | 3.18E-01 | 4.31E-01 | 0.87           | 0.6       | 1.26      | 4.53E-01   | 7.51E-01   |
| WDR72        | 15  | 51,295,884  | rs566369   | intensive    | 0.75         | 0.57      | 0.97      | 2.47E-02        | 1.09E-02        | 0.62 | 0.34      | 1.11      | 8.42E-02 | 6.81E-02 | 0.36           | 0.16      | 0.81      | 3.72E-03   | 4.54E-03   |
| WDR72        | 15  | 51,296,486  | rs482541   | combined     | 0.93         | 0.78      | 1.1       | 3.79E-01        | 3.19E-01        | 0.75 | 0.54      | 1.03      | 6.31E-02 | 1.02E-01 | 0.69           | 0.5       | 0.97      | 2.32E-02   | 5.67E-02   |
| WDR72        | 15  | 51,296,486  | rs482541   | intensive    | 0.75         | 0.57      | 0.97      | 2.47E-02        | 1.09E-02        | 0.62 | 0.34      | 1.11      | 8.42E-02 | 6.81E-02 | 0.36           | 0.16      | 0.81      | 3.72E-03   | 4.54E-03   |
| WDR72        | 15  | 51,296,486  | rs482541   | conventional | 1.2          | 0.95      | 1.5       | 1.28E-01        | 1.00E-01        | 0.82 | 0.56      | 1.22      | 3.18E-01 | 4.31E-01 | 0.87           | 0.6       | 1.26      | 4.53E-01   | 7.51E-01   |

**Supplementary Table 7.** Association of top 13 SNPs for HbA1c identified in DCCT, tested for association with HbA1c in GoKinD, cases and controls separately.

| TRAIT        | group           | chr       | pos                | nearest gene  | MARKER           | ALLELES    | FREQ1        | RSQR          | EFFECT1_add  | STDERR_add   | CHISQ_add    | PVALUE_add     |
|--------------|-----------------|-----------|--------------------|---------------|------------------|------------|--------------|---------------|--------------|--------------|--------------|----------------|
| hba1c        | cases           | 9         | 16,779,024         | BNC2          | rs10810632       | T,C        | 0.9296       | 0.9388        | 0.164        | 0.127        | 1.6612       | <b>0.1974</b>  |
| hba1c        | controls        | 9         | 16,779,024         | BNC2          | rs10810632       | T,C        | 0.9296       | 0.9388        | 0.082        | 0.097        | 0.7044       | <b>0.4013</b>  |
| hba1c        | cases           | 9         | 16,779,436         | BNC2          | rs6475082        | A,G        | 0.9278       | 0.9962        | 0.153        | 0.123        | 1.5495       | <b>0.2132</b>  |
| hba1c        | controls        | 9         | 16,779,436         | BNC2          | rs6475082        | A,G        | 0.9278       | 0.9962        | 0.068        | 0.093        | 0.5317       | <b>0.4659</b>  |
| hba1c        | cases           | 9         | 16,779,878         | BNC2          | rs4961760        | T,C        | 0.9278       | 0.9977        | 0.153        | 0.123        | 1.5473       | <b>0.2135</b>  |
| hba1c        | controls        | 9         | 16,779,878         | BNC2          | rs4961760        | T,C        | 0.9278       | 0.9977        | 0.068        | 0.093        | 0.5281       | <b>0.4674</b>  |
| hba1c        | cases           | 9         | 16,791,850         | BNC2          | rs2254193        | A,C        | 0.931        | 0.9998        | 0.141        | 0.12         | 1.3778       | <b>0.2405</b>  |
| hba1c        | controls        | 9         | 16,791,850         | BNC2          | rs2254193        | A,C        | 0.931        | 0.9998        | 0.082        | 0.098        | 0.7089       | <b>0.3998</b>  |
| hba1c        | cases           | 10        | 108,113,589        | SORCS1        | rs1358030        | G,A        | 0.3561       | 0.8017        | -0.019       | 0.074        | 0.0626       | <b>0.8024</b>  |
| <b>hba1c</b> | <b>controls</b> | <b>10</b> | <b>108,113,589</b> | <b>SORCS1</b> | <b>rs1358030</b> | <b>G,A</b> | <b>0.356</b> | <b>0.8017</b> | <b>0.146</b> | <b>0.057</b> | <b>6.635</b> | <b>0.01</b>    |
| hba1c        | cases           | 14        | 94,375,765         | GSC           | rs11624318       | C,A        | 0.8051       | 0.8483        | -0.078       | 0.086        | 0.8315       | <b>0.3618</b>  |
| hba1c        | controls        | 14        | 94,375,765         | GSC           | rs11624318       | C,A        | 0.8051       | 0.8483        | -0.045       | 0.067        | 0.4401       | <b>0.5071</b>  |
| hba1c        | cases           | 14        | 94,405,244         | GSC           | rs11160219       | G,A        | 0.7613       | 0.4048        | -0.209       | 0.114        | 3.3627       | <b>0.06669</b> |
| hba1c        | controls        | 14        | 94,405,244         | GSC           | rs11160219       | G,A        | 0.7613       | 0.4048        | 0            | 0.09         | 0            | <b>0.9992</b>  |
| hba1c        | cases           | 14        | 94,407,241         | GSC           | rs8007115        | C,T        | 0.7721       | 0.3254        | -0.178       | 0.128        | 1.9201       | <b>0.1658</b>  |
| hba1c        | controls        | 14        | 94,407,241         | GSC           | rs8007115        | C,T        | 0.7721       | 0.3254        | -0.016       | 0.101        | 0.0251       | <b>0.8742</b>  |
| hba1c        | cases           | 15        | 51,277,554         | WDR72         | rs493218         | T,C        | 0.9016       | 0.989         | 0.087        | 0.115        | 0.5628       | <b>0.4531</b>  |
| hba1c        | controls        | 15        | 51,277,554         | WDR72         | rs493218         | T,C        | 0.9016       | 0.989         | 0.058        | 0.08         | 0.5174       | <b>0.472</b>   |
| hba1c        | cases           | 15        | 51,291,924         | WDR72         | rs572221         | G,A        | 0.9025       | 1             | 0.083        | 0.115        | 0.5207       | <b>0.4705</b>  |
| hba1c        | controls        | 15        | 51,291,924         | WDR72         | rs572221         | G,A        | 0.9025       | 1             | 0.059        | 0.08         | 0.5446       | <b>0.4605</b>  |
| hba1c        | cases           | 15        | 51,291,964         | WDR72         | rs690271         | G,A        | 0.9025       | 1             | 0.083        | 0.115        | 0.5207       | <b>0.4705</b>  |
| hba1c        | controls        | 15        | 51,291,964         | WDR72         | rs690271         | G,A        | 0.9025       | 1             | 0.059        | 0.08         | 0.5446       | <b>0.4605</b>  |
| hba1c        | cases           | 15        | 51,295,884         | WDR72         | rs566369         | G,A        | 0.9025       | 1             | 0.083        | 0.115        | 0.5207       | <b>0.4705</b>  |
| hba1c        | controls        | 15        | 51,295,884         | WDR72         | rs566369         | G,A        | 0.9025       | 1             | 0.059        | 0.08         | 0.5446       | <b>0.4605</b>  |
| hba1c        | cases           | 15        | 51,296,486         | WDR72         | rs482541         | G,A        | 0.9024       | 0.999         | 0.083        | 0.115        | 0.5199       | <b>0.4709</b>  |
| hba1c        | controls        | 15        | 51,296,486         | WDR72         | rs482541         | G,A        | 0.9024       | 0.999         | 0.059        | 0.08         | 0.5473       | <b>0.4594</b>  |



**Supplementary Table 8.** Association of top 13 SNPs for HbA1c identified in DCCT, tested for association with renal disease case-control status in GoKinD.

| CHR | SNP        | BP          | nearest gene | A1 | F_A     | F_U     | A2 | CHISQ   | P       | OR     |
|-----|------------|-------------|--------------|----|---------|---------|----|---------|---------|--------|
| 9   | rs10810632 | 16,779,024  | BNC2         | C  | 0.0717  | 0.07301 | T  | 0.02126 | 0.8841  | 0.9806 |
| 9   | rs6475082  | 16,779,436  | BNC2         | G  | 0.0717  | 0.07301 | A  | 0.02126 | 0.8841  | 0.9806 |
| 9   | rs4961760  | 16,779,878  | BNC2         | C  | 0.0717  | 0.07301 | T  | 0.02126 | 0.8841  | 0.9806 |
| 9   | rs2254193  | 16,791,850  | BNC2         | C  | 0.0717  | 0.06659 | A  | 0.3348  | 0.5629  | 1.083  |
| 9   | rs2254468  | 16,794,197  | BNC2         | G  | 0.06981 | 0.06484 | A  | 0.3253  | 0.5684  | 1.082  |
| 10  | rs1358030  | 108,113,589 | SORCS1       | G  | 0.3314  | 0.3405  | A  | 0.3053  | 0.5806  | 0.9601 |
| 14  | rs11624318 | 94,375,765  | GSC          | A  | 0.1943  | 0.1846  | C  | 0.5118  | 0.4744  | 1.066  |
| 14  | rs11160219 | 94,405,244  | GSC          | A  | 0.2019  | 0.212   | G  | 0.5167  | 0.4723  | 0.94   |
| 14  | rs8007115  | 94,407,241  | GSC          | T  | 0.1761  | 0.1904  | C  | 1.128   | 0.2882  | 0.9087 |
| 15  | rs493218   | 51,277,554  | WDR72        | C  | 0.08868 | 0.1057  | T  | 2.721   | 0.09901 | 0.8231 |
| 15  | rs572221   | 51,291,924  | WDR72        | A  | 0.08868 | 0.1057  | G  | 2.721   | 0.09901 | 0.8231 |
| 15  | rs690271   | 51,291,964  | WDR72        | A  | 0.08868 | 0.1057  | G  | 2.721   | 0.09901 | 0.8231 |
| 15  | rs566369   | 51,295,884  | WDR72        | A  | 0.08868 | 0.1057  | G  | 2.721   | 0.09901 | 0.8231 |
| 15  | rs482541   | 51,296,486  | WDR72        | A  | 0.08868 | 0.1057  | G  | 2.721   | 0.09901 | 0.8231 |

**Supplementary Table 9.** Effect on SNP association with mean HbA1c in DCCT when either no covariates, mean BMI, or mean insulin dose during DCCT were used as covariates.

| chr | SNP        | Treatment group | Covariate    | SNP effect                         |                      |
|-----|------------|-----------------|--------------|------------------------------------|----------------------|
|     |            |                 |              | $\beta$ (SE)                       | P value              |
| 10  | rs1358030  | CONVENTIONAL    | none         | 0.329 (0.055)                      | 3.5 E-9              |
| 10  | rs1358030  | CONVENTIONAL    | BMI          | 0.328 (0.055)                      | 3.6 E-9              |
| 10  | rs1358030  | CONVENTIONAL    | Insulin dose | 0.334 (0.055)                      | 2.0E-9               |
| 9   | rs10810632 | CONVENTIONAL    | none         | 0.568 (0.102)                      | 3.7E-8               |
| 9   | rs10810632 | CONVENTIONAL    | BMI          | 0.578 (0.102)                      | 3.8E-8               |
| 9   | rs10810632 | CONVENTIONAL    | Insulin dose | 0.562 (0.102)                      | 4.8E-8               |
| 14  | rs11624318 | CONVENTIONAL    | none         | 0.554 (0.193)*<br>0.560 (0.198)†   | 4.2E-3*<br>4.9E-3†   |
| 14  | rs11624318 | CONVENTIONAL    | BMI          | 0.550 (0.193)*<br>0.556 (0.198)†   | 4.5E-3*<br>5.3 E-3†  |
| 14  | rs11624318 | CONVENTIONAL    | Insulin dose | 0.560 (0.192)*<br>0.564 (0.198)†   | 3.8 E-3*<br>4.5 E-3† |
| 14  | rs11624318 | INTENSIVE       | none         | 0.600 (0.192) *<br>0.521 (0.200) † | 1.9 E-3*<br>9.2 E-3† |
| 14  | rs11624318 | INTENSIVE       | BMI          | 0.564 (0.190) *<br>0.481 (0.197) † | 3.1 E-3*<br>1.5 E-2† |
| 14  | rs11624318 | INTENSIVE       | Insulin dose | 0.592 (0.182) *<br>0.524 (0.189) † | 1.2 E-3*<br>5.8 E-3† |
| 15  | rs482541   | INTENSIVE       | none         | -0.434 (0.084)                     | 3.5 E-7              |
| 15  | rs482541   | INTENSIVE       | BMI          | -0.419 (0.083)                     | 6.1 E-7              |
| 15  | rs482541   | INTENSIVE       | Insulin dose | -0.413 (0.080)                     | 3.7 E-7              |

Results for all SNPs, apart from rs11624318, are from an additive coding of genotypes. For rs11624318, since there is evidence for deviation from an additive model (Table 2), we used a 2df test, and report genotype specific parameter estimates and p values, with the following coded: \* = common homozygote compared to rare homozygote, † = heterozygote compared to rare homozygote.

From file: hba1c\_covar\_bmi\_ins\_all; dated: 24jul09

Supplementary Table 10. List of MAGIC investigators.

AUTHORSHIP FOR MAGIC HbA1C  
DATA

| Cohort             | First       | Middle | Last           | Dept                                                                                                                                       | Univ/Corp                                                                     | Street                                                                                | City       | Postal Code                  | Country     |
|--------------------|-------------|--------|----------------|--------------------------------------------------------------------------------------------------------------------------------------------|-------------------------------------------------------------------------------|---------------------------------------------------------------------------------------|------------|------------------------------|-------------|
| SardinIA           | Goncalo     |        | Abecasis       | Center for Statistical Genetics                                                                                                            | University of Michigan                                                        | 1420 Washington Heights                                                               | Ann Arbor  | 48109                        | MI, USA     |
| DGI                | David       |        | Altshuler      | Program in Medical and Population Genetics<br>McKusick-Nathans Institute of Genetic Medicine and<br>Department of Medicine                 | Broad Institute of Harvard and MIT                                            | 7 Cambridge Center<br>Broadway Research Building,<br>Room 580, 733 N. Broadway St.    | Cambridge  | Massachusetts 02142          | USA         |
| ARIC               | Dan         |        | Arking         | Department of Medicine                                                                                                                     | Johns Hopkins University                                                      |                                                                                       |            | 21205                        | USA         |
| DESIR              | Beverley    |        | Balkau         | INSERM U780                                                                                                                                | University Paris-Sud, Orsay                                                   |                                                                                       | Villejuif  | F-94807                      | France      |
| Fenland            | Daniel      |        | Barnes         | MRC Epidemiology Unit                                                                                                                      | Institute of Metabolic Science                                                | Box 285 Addenbrooke's Hospital                                                        | Cambridge  | CB2 2QQ                      | UK          |
| WTSI               | Ines        |        | Barroso        | Human Genetics                                                                                                                             | Wellcome Trust Sanger Institute                                               | Genome Campus                                                                         | Hinxton    | CB10 1SA                     | UK          |
| ARIC               | Eric        |        | Boerwinkle     | Institute of Molecular Medicine                                                                                                            | University of Texas Health Science Center at<br>Houston                       | RAS E447, 1200 Herman Pressler<br>Dr.                                                 | Houston    | 77030                        | USA         |
| DESIR              | Amélie      |        | Bonnefond      | CNRS-UMR-8090                                                                                                                              | Institut Pasteur de Lille and Lille 2 University                              | 1 Rue du Pr Calmette BP 245                                                           | Lille      | F-59000                      | France      |
| NTR                | Dorret      |        | Boomsma        | Biological Psychology                                                                                                                      | VU University                                                                 | Van der Boechorststraat 1                                                             | Amsterdam  | 1081 BT                      | Netherlands |
| genomeEUtwin/Dutch | Dorret      |        | Boomsma        | Biological Psychology                                                                                                                      | VU University                                                                 | Van der Boechorststraat 1                                                             | Amsterdam  | 1081 BT                      | Netherlands |
| Sorbs              | Yvonne      |        | Böttcher       | Department of Medicine                                                                                                                     | University of Leipzig                                                         | Liebigstrasse 20                                                                      | Leipzig    | 04103                        | Germany     |
| DESIR              | Nabila      |        | Bouatia-Naji   | CNRS-UMR-8090                                                                                                                              | Institut Pasteur de Lille and Lille 2 University                              | 1 Rue du Pr Calmette BP 245                                                           | Lille      | F-59000                      | France      |
| WTSI               | Suzannah    |        | Bumpstead      | Human Genetics                                                                                                                             | Wellcome Trust Sanger Institute                                               | Genome Campus                                                                         | Hinxton    | CB10 1SA                     | UK          |
| ORCADES            | Harry       |        | Campbell       | Centre for Population Health Sciences                                                                                                      | University of Edinburgh                                                       | Teviot Place                                                                          | Edinburgh  | EH8 9AG                      | Scotland    |
| SardinIA           | Antonio     |        | Cao            | Istituto di Neurogenetica e Neurofarmacologia                                                                                              | CNR                                                                           | Cittadella Universitaria di<br>Monerrato, SS 554 Km 4500                              | Monerrato  | 09042                        | Italy       |
| Lolipop            | John        |        | Chambers       | Department of Epidemiology and Public Health                                                                                               | Imperial College London                                                       | Norfolk Place                                                                         | London     | W2 1NY                       | UK          |
| Procardis          | Robert      |        | Clark          | Clinical Trials Services Unit                                                                                                              | University of Oxford                                                          |                                                                                       | Oxford     | OX3 7LF                      | UK          |
| ARIC               | Josef       |        | Coresh         | Departments of Epidemiology, Biostatistics, and Medicine                                                                                   | Johns Hopkins University                                                      | 2024 E. Monumnet St, Suite 2-600                                                      | Baltimore  | 21287                        | USA         |
| NTR                | Eco         |        | de Geus        | Biological Psychology                                                                                                                      | VU University                                                                 | Van der Boechorststraat 1<br>Cittadella Universitaria di<br>Monerrato, SS 554 Km 4500 | Amsterdam  | 1081 BT                      | Netherlands |
| SardinIA           | Mariano     |        | Dei            | Istituto di Neurogenetica e Neurofarmacologia                                                                                              | CNR                                                                           | Cittadella Universitaria di<br>Monerrato, SS 554 Km 4500                              | Monerrato  | 09042                        | Italy       |
| WTSI               | Panos       |        | Deloukas       | Human Genetics                                                                                                                             | Wellcome Trust Sanger Institute                                               | Genome Campus                                                                         | Hinxton    | CB10 1SA                     | UK          |
| FHS                | Josee       |        | Dupuis         | Department of Biostatistics                                                                                                                | Boston University School of Public Health                                     | 801 Massachusetts Avenue                                                              | Boston     | 02118                        | USA         |
| BLSA               | Josephine   | M      | Egan           | Laboratory of Clinical Investigation                                                                                                       | National Institute of Aging                                                   | 251 Bayview Boulevard, Suite 100                                                      | Baltimore  | 21224                        | USA         |
| BLSA               | Luigi       |        | Ferrucci       | Clinical Research Branch                                                                                                                   | National Institute of Aging                                                   | 3001 S Hanover Street                                                                 | Baltimore  | 21250                        | USA         |
| FHS                | Jose        | C      | Florez         | Center for Human Genetic Research                                                                                                          | Massachusetts General Hospital                                                | 185 Cambridge Street                                                                  | Boston     | 02114                        | USA         |
| Fenland            | Nita        |        | Forouhi        | MRC Epidemiology Unit                                                                                                                      | Institute of Metabolic Science                                                | Box 285 Addenbrooke's Hospital                                                        | Cambridge  | CB2 2QQ                      | UK          |
| FHS                | Caroline    |        | Fox            | Division of Endocrinology, Diabetes, and Hypertension                                                                                      | Brigham and Women's Hospital                                                  | 221 Longwood Avenue                                                                   | Boston     | 02115                        | USA         |
| ORCADES            | Christopher |        | Franklin       | Centre for Population Health Sciences                                                                                                      | University of Edinburgh                                                       | Teviot Place                                                                          | Edinburgh  | EH8 9AG                      | Scotland    |
| DESIR              | Philippe    |        | Froguel        | CNRS-UMR-8090                                                                                                                              | Institut Pasteur de Lille and Lille 2 University                              | 1 Rue du Pr Calmette BP 245                                                           | Lille      | F-59000                      | France      |
| DESIR              | Sophie      |        | Gallina        | CNRS-UMR-8090                                                                                                                              | Institut Pasteur de Lille and Lille 2 University                              | 1 Rue du Pr Calmette BP 245                                                           | Lille      | F-59000                      | France      |
| KORA F3/S4         | Christian   |        | Gieger         | Institute of Epidemiology                                                                                                                  | Helmholtz Zentrum München, German Research<br>Center for Environmental Health | Ingolstaedter Landstr. 1                                                              | Neuherberg | 85764                        | Germany     |
| Procardis          | Anuj        |        | Goel           | Department of Cardiovascular Medicine                                                                                                      | University of Oxford                                                          |                                                                                       | Oxford     | OX3 9DU                      | UK          |
| KORA F3/S4         | Harald      |        | Grallert       | Institute of Epidemiology                                                                                                                  | Helmholtz Zentrum München, German Research<br>Center for Environmental Health | Ingolstaedter Landstr. 1                                                              | Neuherberg | 85764                        | Germany     |
| SHIP               | Andreas     |        | Greinacher     | Immunology and Transfusion Medicine                                                                                                        | Ernst Moritz Arndt University Greifswald                                      | Sauerbruchstrasse                                                                     | Greifswald | 17475                        | Germany     |
| DGI                | Leif        |        | Groop          | Department of Clinical Sciences                                                                                                            | Lund University                                                               | CRC, ent73, bild.91                                                                   | Malmö      | 20502                        | Sweden      |
| B58C-WTCCC         | David       |        | Hadley         | Division of Community Health Sciences<br>Atherosclerosis Research Unit, Department of Medicine,<br>Karolinska Institutet Stockholm, Sweden | St George's, University of London                                             | Cranmer Terrace                                                                       | London     | SW17 0RE                     | UK          |
| Procardis          | Anders      |        | Hamsten        | Karolinska Institutet Stockholm, Sweden                                                                                                    | Karolinska Institutet                                                         |                                                                                       | Stockholm  |                              | Sweden      |
| CROATIA            | Caroline    |        | Hayward        | Human Genetics Unit                                                                                                                        | Medical Research Council                                                      | Crewe Road                                                                            | Edinburgh  | EH4 2XU                      | UK          |
| B58C-T1DGC         | Simon       |        | Heath          | Statistical Genetics                                                                                                                       | Centre National de Genotypage                                                 | 2, rue Gaston Crémieux                                                                | Evry       | Cedex<br>CP 5721, 91057 Evry | France      |
| SHIP               | Georg       |        | Homuth         | Interfaculty Institute for Genetics and Functional Genomics                                                                                | Ernst Moritz Arndt University Greifswald                                      | F.-L.-Jahn-Str. 15a                                                                   | Greifswald | 17487                        | Germany     |
| NTR                | Jouke-Jan   |        | Hottenga       | Biological Psychology                                                                                                                      | VU University                                                                 | Van der Boechorststraat 1                                                             | Amsterdam  | 1081 BT                      | Netherlands |
| genomeEUtwin/Dutch | Jouke-Jan   |        | Hottenga       | Biological Psychology                                                                                                                      | VU University                                                                 | Van der Boechorststraat 1                                                             | Amsterdam  | 1081 BT                      | Netherlands |
| FHS                | Rachel      |        | Hunter-Merrill | Department of Biostatistics                                                                                                                | Boston University School of Public Health                                     | 801 Massachusetts Avenue                                                              | Boston     | 02118                        | USA         |
| KORA F3/S4         | Thomas      |        | Illig          | Institute of Epidemiology                                                                                                                  | Helmholtz Zentrum München, German Research                                    | Ingolstaedter Landstr. 1                                                              | Neuherberg | 85764                        | Germany     |

|                                 |                  |              |                   |                                                                                                                                                           |                                                                               |                                                          |                    |                     |         |  |
|---------------------------------|------------------|--------------|-------------------|-----------------------------------------------------------------------------------------------------------------------------------------------------------|-------------------------------------------------------------------------------|----------------------------------------------------------|--------------------|---------------------|---------|--|
|                                 |                  |              |                   |                                                                                                                                                           | Center for Environmental Health                                               |                                                          |                    |                     |         |  |
| <b>GenMets</b>                  | <b>Antti</b>     |              | <b>Jula</b>       | Chronic Disease Prevention                                                                                                                                | National Institute for Health and Welfare                                     | P.O.Box 57                                               | Turku              | FI-20521            | Finland |  |
| <b>ARIC</b>                     | <b>W. H.</b>     | <b>Linda</b> | <b>Kao</b>        | Epidemiology and Medicine                                                                                                                                 | Johns Hopkins University                                                      | 615 N. Wolfe St., Room W6513                             | Baltimore          | 21025               | USA     |  |
| <b>EPIC-Norfolk</b>             | <b>Kay-Tee</b>   |              | <b>Khaw</b>       | Public Health and Primary Care                                                                                                                            | University of Cambridge                                                       | Box 251 Addenbrooke's Hospital                           | Cambridge          | CB2 2QQ             | UK      |  |
| <b>deCODE</b>                   | <b>Augustine</b> |              | <b>Kong</b>       | Statistics<br>National Heart and Lung Institute, Hammersmith Hospital campus                                                                              | deCODE genetics                                                               | Sturlugata 8                                             | Reykjavik          | 101                 | Iceland |  |
| <b>Lolipop</b>                  | <b>Jaspal</b>    |              | <b>Kooner</b>     |                                                                                                                                                           | Imperial College London                                                       | Du Cane Road                                             | London             | W11 0HS             | UK      |  |
| <b>ARIC</b>                     | <b>Anna</b>      |              | <b>Kottgen</b>    | Departments of Epidemiology                                                                                                                               | Johns Hopkins University                                                      | 615 N. Wolfe St., Room W6021                             | Baltimore          | 21025               | USA     |  |
| <b>Sorbs</b>                    | <b>Peter</b>     |              | <b>Kovacs</b>     | Interdisciplinary Centre for Clinical Research                                                                                                            | University of Leipzig                                                         | Inselstrasse 22                                          | Leipzig            | 04103               | Germany |  |
| <b>Sorbs</b>                    | <b>Knut</b>      |              | <b>Krohn</b>      | Interdisciplinary Centre for Clinical Research                                                                                                            | University of Leipzig                                                         | Inselstrasse 22                                          | Leipzig            | 04103               | Germany |  |
| <b>KORA F3/S4</b>               | <b>Brigitte</b>  |              | <b>Kühnel</b>     | Institute of Epidemiology                                                                                                                                 | Center for Environmental Health                                               | Ingolstaedter Landstr. 1                                 | Neuherberg         | 85764               | Germany |  |
| <b>Fenland and EPIC-Norfolk</b> | <b>Claudia</b>   |              | <b>Langenberg</b> | MRC Epidemiology Unit                                                                                                                                     | Institute of Metabolic Science                                                | Box 285 Addenbrooke's Hospital                           | Cambridge          | CB2 2QQ             | UK      |  |
| <b>DESIR</b>                    | <b>Cécile</b>    |              | <b>Lecoeur</b>    | CNRS-UMR-8090                                                                                                                                             | Institut Pasteur de Lille and Lille 2 University                              | 1 Rue du Pr Calmette BP 245                              | Lille              | F-59000             | France  |  |
| <b>ARIC</b>                     | <b>Man</b>       |              | <b>Li</b>         | Departments of Epidemiology                                                                                                                               | Johns Hopkins University                                                      | 615 N. Wolfe St., Room W6507B                            | Baltimore          | 21025               | USA     |  |
| <b>Fenland and EPIC-Norfolk</b> | <b>Ruth</b>      | <b>JF</b>    | <b>Loos</b>       | MRC Epidemiology Unit                                                                                                                                     | Institute of Metabolic Science                                                | Box 285 Addenbrooke's Hospital                           | Cambridge          | CB2 2QQ             | UK      |  |
| <b>Fenland and EPIC-Norfolk</b> | <b>Jian'an</b>   |              | <b>Luan</b>       | MRC Epidemiology Unit                                                                                                                                     | Institute of Metabolic Science                                                | Box 285 Addenbrooke's Hospital                           | Cambridge          | CB2 2QQ             | UK      |  |
| <b>DGI</b>                      | <b>Valeriya</b>  |              | <b>Lyssenko</b>   | Department of Clinical Sciences                                                                                                                           | Lund University                                                               | CRC, ent73, bild.91                                      | Malmö              | 20502               | Sweden  |  |
| <b>Sorbs</b>                    | <b>Reedik</b>    |              | <b>Mägi</b>       | Oxford Centre for Diabetes, Endocrinology and Metabolism                                                                                                  | University of Oxford                                                          | Old Road                                                 | Oxford             | OX3 7LJ             | UK      |  |
| <b>genomeEUTwin/Sweden</b>      | <b>Patrik</b>    | <b>KE</b>    | <b>Magnusson</b>  | Department of Medical Epidemiology and Biostatistics<br>Atherosclerosis Research Unit, Department of Medicine,<br>Karolinska Institutet Stockholm, Sweden | Karolinska Institutet                                                         | Nobels vag 12 a                                          | Stockholm          | SE-171 77           | Sweden  |  |
| <b>Procardis</b>                | <b>Anders</b>    |              | <b>Malarstig</b>  |                                                                                                                                                           | Karolinska Institutet                                                         |                                                          | Stockholm          |                     | Sweden  |  |
| <b>GenomeEUTwin (TwinsUK)</b>   | <b>Massimo</b>   |              | <b>Mangino</b>    | Department of Twin Research and Genetic Epidemiology                                                                                                      | King's College London                                                         | Lambeth Palace Rd                                        | London             | SE1 7EH             | UK      |  |
| <b>B58C-WTCCC</b>               | <b>Wendy</b>     | <b>L</b>     | <b>McArdle</b>    | Department of Social Medicine                                                                                                                             | University of Bristol                                                         | Oakfield House, Oakfield Grove                           | Bristol            | BS8 2BN             | UK      |  |
| <b>B58C-T1DGC</b>               | <b>Wendy</b>     | <b>L</b>     | <b>McArdle</b>    | Department of Social Medicine                                                                                                                             | University of Bristol                                                         | Oakfield House, Oakfield Grove                           | Bristol            | BS8 2BN             | UK      |  |
| <b>ENGAGE</b>                   | <b>Mark</b>      | <b>I</b>     | <b>McCarthy</b>   | Oxford Centre for Diabetes, Endocrinology and Metabolism                                                                                                  | University of Oxford                                                          | Old Road                                                 | Oxford             | OX3 7LJ             | UK      |  |
| <b>FHS</b>                      | <b>James</b>     | <b>B</b>     | <b>Meigs</b>      | General Medicine Division                                                                                                                                 | Massachusetts General Hospital                                                | 50 Staniford Street 9th floor                            | Boston             | 02114               | USA     |  |
| <b>KORA F3/S4</b>               | <b>Christa</b>   |              | <b>Meisinger</b>  | Institute of Epidemiology                                                                                                                                 | Helmholtz Zentrum München, German Research<br>Center for Environmental Health | Ingolstaedter Landstr. 1                                 | Neuherberg         | 85764               | Germany |  |
| <b>Lolipop</b>                  | <b>Vincent</b>   | <b>E</b>     | <b>Mooser</b>     | Genetics, Drug Discovery                                                                                                                                  | GlaxoSmithKline                                                               | 710 Swedeland Road                                       | King of Prussia    | PA                  | USA     |  |
| <b>SHIP</b>                     | <b>Matthias</b>  |              | <b>Nauck</b>      | Institute for Clinical Chemistry and Laboratory Medicine                                                                                                  | Ernst Moritz Arndt University Greifswald                                      | Sauerbruchstrasse                                        | Greifswald         | 17475               | Germany |  |
| <b>SardiNIA</b>                 | <b>Nazario</b>   |              | <b>Olla</b>       | Istituto di Neurogenetica e Neurofarmacologia                                                                                                             | CNR                                                                           | Cittadella Universitaria di<br>Monerrato, SS 554 Km 4500 | Monerrato          | 09042               | Italy   |  |
| <b>ARIC</b>                     | <b>James</b>     | <b>S</b>     | <b>Pankow</b>     | Division of Epidemiology and Community Health                                                                                                             | University of Minnesota                                                       | 1300 South Second Street, Suite<br>300                   | Minneapolis,<br>MN | 55454               | USA     |  |
| <b>WTSI</b>                     | <b>Felicity</b>  |              | <b>Payne</b>      | Human Genetics                                                                                                                                            | Wellcome Trust Sanger Institute                                               | Genome Campus                                            | Hinxton            | CB10 1SA            | UK      |  |
| <b>Procardis</b>                | <b>John</b>      | <b>F</b>     | <b>Peden</b>      | Department of Cardiovascular Medicine                                                                                                                     | University of Oxford                                                          |                                                          | Oxford             | OX3 9DU             | UK      |  |
| <b>genomeEUTwin/Sweden</b>      | <b>Nancy</b>     |              | <b>Pedersen</b>   |                                                                                                                                                           | Karolinska Institutet                                                         |                                                          | Stockholm          | SE-171 77           | Sweden  |  |
| <b>GenMets</b>                  | <b>Leena</b>     |              | <b>Peltonen</b>   | Human Genetics                                                                                                                                            | Wellcome Trust Sanger Institute                                               | Genome Campus                                            | Hinxton            | CB10 1SA            | UK      |  |
| <b>GenMets</b>                  | <b>Markus</b>    |              | <b>Perola</b>     | Chronic Disease Prevention                                                                                                                                | National Institute for Health and Welfare                                     | P.O. Box 104                                             | Helsinki           | FI-00251            | Finland |  |
| <b>CROATIA</b>                  | <b>Ozren</b>     |              | <b>Polasek</b>    | Andrija Stampar School of Public Health                                                                                                                   | University of Zagreb Medical School                                           | Rockefellerova 4                                         | Zagreb             | 10000               | Croatia |  |
| <b>SardiNIA</b>                 | <b>Eleonora</b>  |              | <b>Porcu</b>      | Istituto di Neurogenetica e Neurofarmacologia                                                                                                             | CNR                                                                           | Cittadella Universitaria di<br>Monerrato, SS 554 Km 4500 | Monerrato          | 09042               | Italy   |  |
| <b>Sorbs</b>                    | <b>Inga</b>      |              | <b>Prokopenko</b> | Oxford Centre for Diabetes, Endocrinology and Metabolism                                                                                                  | University of Oxford                                                          | Old Road                                                 | Oxford             | OX3 7LJ             | UK      |  |
| <b>SHIP</b>                     | <b>Dörte</b>     |              | <b>Radke</b>      | Institute for Community Medicine - SHIP/KEF                                                                                                               | Ernst Moritz Arndt University Greifswald                                      | Walther-Rathenau-Str. 48                                 | Greifswald         | 17475               | Germany |  |
| <b>GenMets</b>                  | <b>Samuli</b>    |              | <b>Ripatti</b>    | Chronic Disease Prevention                                                                                                                                | National Institute for Health and Welfare                                     | P.O. Box 104                                             | Helsinki           | FI-00251            | Finland |  |
| <b>DESIR</b>                    | <b>Ghislain</b>  |              | <b>Rocheleau</b>  | Department of Human Genetics                                                                                                                              | Faculty of Medicine, McGill University Montreal                               |                                                          | Montreal           | H3H 1P3             | Canada  |  |
| <b>CROATIA</b>                  | <b>Igor</b>      |              | <b>Rudan</b>      | Department of Public Health Sciences<br>Leibniz-Institut für Arterioskleroseforschung an der<br>Universität Münster, Münster, Germany                     | The University of Edinburgh Medical School                                    | Teviot Place                                             | Edinburgh          | EH8 9AG             | UK      |  |
| <b>Procardis</b>                | <b>Stephan</b>   |              | <b>Rust</b>       |                                                                                                                                                           | Universität Münster                                                           |                                                          | Munster            |                     | Germany |  |
| <b>GenMets</b>                  | <b>Veikko</b>    |              | <b>Salomaa</b>    | Chronic Disease Prevention                                                                                                                                | National Institute for Health and Welfare                                     | P.O. Box 104                                             | Helsinki           | FI-00251            | Finland |  |
| <b>SardiNIA</b>                 | <b>Serena</b>    |              | <b>Sanna</b>      | Istituto di Neurogenetica e Neurofarmacologia                                                                                                             | CNR                                                                           | Cittadella Universitaria di<br>Monerrato, SS 554 Km 4500 | Monerrato          | 09042               | Italy   |  |
| <b>DGI</b>                      | <b>Richa</b>     |              | <b>Saxena</b>     | Program in Medical and Population Genetics                                                                                                                | Broad Institute of Harvard and MIT                                            | 7 Cambridge Center                                       | Cambridge          | Massachusetts 02142 | USA     |  |

|                          |           |    |                      |                                                             |                                                                               |                                                          |                 |          |             |
|--------------------------|-----------|----|----------------------|-------------------------------------------------------------|-------------------------------------------------------------------------------|----------------------------------------------------------|-----------------|----------|-------------|
| SardiNIA                 | David     |    | Schlessinger         | Gerontology Research Center                                 | National Institute on Aging                                                   | 5600 Nathan Shock Drive,                                 | Baltimore       | 21224    | MD,USA      |
| ARIC                     | Elizabeth |    | Selvin               | Departments of Epidemiology and Medicine                    | Johns Hopkins University                                                      | 2024 E. Monumnet St, Suite 2-600                         | Baltimore       | 21287    | USA         |
| DESIR                    | Robert    |    | Sladek               | Department of Human Genetics                                | Faculty of Medicine, McGill University Montreal                               |                                                          | Montreal        | H3H 1P3  | Canada      |
| Lolipop                  | Kjioung   |    | Song                 | Genetics, Drug Discovery                                    | GlaxoSmithKline                                                               | 711 Swedeland Road                                       | King of Prussia | PA       | USA         |
| WTSI                     | Nicole    |    | Soranzo              | Human Genetics                                              | Wellcome Trust Sanger Institute                                               | Genome Campus                                            | Hinxton         | CB10 1SA | UK          |
| genomeEUtwin/UK          | Timothy   | D  | Spector              | Department of Twin Research and Genetic Epidemiology        | King's College London                                                         | Lambeth Palace Rd                                        | London          | SE1 7EH  | UK          |
| deCODE                   | Kari      |    | Stefansson           | Population Genomics                                         | deCODE genetics                                                               | Sturlugata 8                                             | Reykjavik       | 101      | Iceland     |
| deCODE                   | Valgerdur |    | Steinthorsdottir     | Population Genomics                                         | deCODE genetics                                                               | Sturlugata 8                                             | Reykjavik       | 101      | Iceland     |
| FHS                      | Elliot    |    | Stolerman            | Center for Human Genetic Research                           | Massachusetts General Hospital                                                | 185 Cambridge Street                                     | Boston          | 02114    | USA         |
| B58C-WTCCC               | David     | P  | Strachan             | Division of Community Health Sciences                       | St George's, University of London                                             | Cranmer Terrace                                          | London          | SW17 0RE | UK          |
| B58C-T1DGC               | David     | P  | Strachan             | Division of Community Health Sciences                       | St George's, University of London                                             | Cranmer Terrace                                          | London          | SW17 0RE | UK          |
| Sorbs                    | Michael   |    | Stumvoll             | Department of Medicine                                      | University of Leipzig                                                         | Liebigstrasse 20                                         | Leipzig         | 04103    | Germany     |
| GenMets                  | Ida       |    | Surakka              | Chronic Disease Prevention                                  | National Institute for Health and Welfare                                     | P.O. Box 30                                              | Helsinki        | FI-00271 | Finland     |
| BLSA                     | Toshiko   |    | Tanaka               |                                                             | Medstar Research Institute                                                    | 3001 S Hanover Street                                    | Baltimore       | 21250    | USA         |
| SHIP                     | Alexander |    | Teumer               | Interfaculty Institute for Genetics and Functional Genomics | Ernst Moritz Arndt University Greifswald                                      | F.-L.-Jahn-Str. 15a                                      | Greifswald      | 17487    | Germany     |
| deCODE                   | Gudmar    |    | Thorleifsson         | Statistics                                                  | deCODE genetics                                                               | Sturlugata 8                                             | Reykjavik       | 101      | Iceland     |
| deCODE                   | Unnur     |    | Thorsteinsdottir     | Population Genomics                                         | deCODE genetics                                                               | Sturlugata 8                                             | Reykjavik       | 101      | Iceland     |
| Sorbs                    | Anke      |    | Tönjes               | Department of Medicine                                      | University of Leipzig                                                         | Liebigstrasse 20                                         | Leipzig         | 04103    | Germany     |
| SardiNIA                 | Manuela   |    | Uda                  | Istituto di Neurogenetica e Neurofarmacologia               | CNR                                                                           | Cittadella Universitaria di<br>Monerrato, SS 554 Km 4500 | Monerrato       | 09042    | Italy       |
| SardiNIA                 | Gianluca  |    | Usala                | Istituto di Neurogenetica e Neurofarmacologia               | CNR                                                                           | Cittadella Universitaria di<br>Monerrato, SS 554 Km 4500 | Monerrato       | 09042    | Italy       |
| CROATIA                  | Veronique |    | Vitart               | Human Genetics Unit                                         | Medical Research Council                                                      | Crewe Road                                               | Edinburgh       | EH4 2XU  | UK          |
| SHIP                     | Henry     |    | Völzke               | Institute for Community Medicine - SHIP/KEF                 | Ernst Moritz Arndt University Greifswald                                      | Walther-Rathenau-Str. 48                                 | Greifswald      | 17475    | Germany     |
| SHIP                     | Henri     |    | Wallaschofski        | Institute for Clinical Chemistry and Laboratory Medicine    | Ernst Moritz Arndt University Greifswald                                      | Sauerbruchstrasse                                        | Greifswald      | 17475    | Germany     |
| Fenland and EPIC-Norfolk | Nicholas  | J  | Wareham              | MRC Epidemiology Unit                                       | Institute of Metabolic Science                                                | Box 285 Addenbrooke's Hospital                           | Cambridge       | CB2 2QQ  | UK          |
| Lolipop                  | Dawn      | M  | Waterworth           | Genetics, Drug Discovery                                    | GlaxoSmithKline                                                               | 709 Swedeland Road                                       | King of Prussia | PA       | USA         |
|                          |           |    | Watkins on behalf of |                                                             |                                                                               |                                                          |                 |          |             |
| Procardis                | Hugh      |    | Procardis Consortium | Department of Cardiovascular Medicine                       | University of Oxford                                                          |                                                          | Oxford          | OX3 9DU  | UK          |
| WTSI                     | Eleanor   |    | Wheeler              | Human Genetics                                              | Wellcome Trust Sanger Institute                                               | Genome Campus                                            | Hinxton         | CB10 1SA | UK          |
|                          |           |    |                      |                                                             | Helmholtz Zentrum München, German Research<br>Center for Environmental Health | Ingolstaedter Landstr. 1                                 | Neuherberg      | 85764    | Germany     |
| KORA F3/S4               | H-Erich   |    | Wichmann             | Institute of Epidemiology                                   | University of Edinburgh                                                       | Teviot Place                                             | Edinburgh       | EH8 9AG  | Scotland    |
| ORCADES                  | Sarah H   |    | Wild                 | Centre for Population Health Sciences                       | VU University                                                                 | Van der Boechorststraat 1                                | Amsterdam       | 1081 BT  | Netherlands |
| NTR                      | Gonneke   |    | Willemsen            | Biological Psychology                                       | VU University                                                                 | Van der Boechorststraat 1                                | Amsterdam       | 1081 BT  | Netherlands |
| genomeEUtwin/Dutch       | Gonneke   |    | Willemsen            | Biological Psychology                                       | University of Edinburgh                                                       | Teviot Place                                             | Edinburgh       | EH8 9AG  | Scotland    |
| ORCADES                  | James F   |    | Wilson               | Centre for Population Health Sciences                       | Medical Research Council                                                      | Crewe Road                                               | Edinburgh       | EH4 2XU  | UK          |
| CROATIA                  | Alan      | F. | Wright               | Human Genetics Unit                                         | Institute of Metabolic Science                                                | Box 285 Addenbrooke's Hospital                           | Cambridge       | CB2 2QQ  | UK          |
| Fenland and EPIC-Norfolk | Jing Hua  |    | Zhao                 | MRC Epidemiology Unit                                       |                                                                               |                                                          |                 |          |             |

**Supplementary Figure 1.** Histogram of Mean HbA1c during DCCT in the conventional treatment group.

## Supplementary Figure 1: mean HbA1c in Conventional Treatment Group

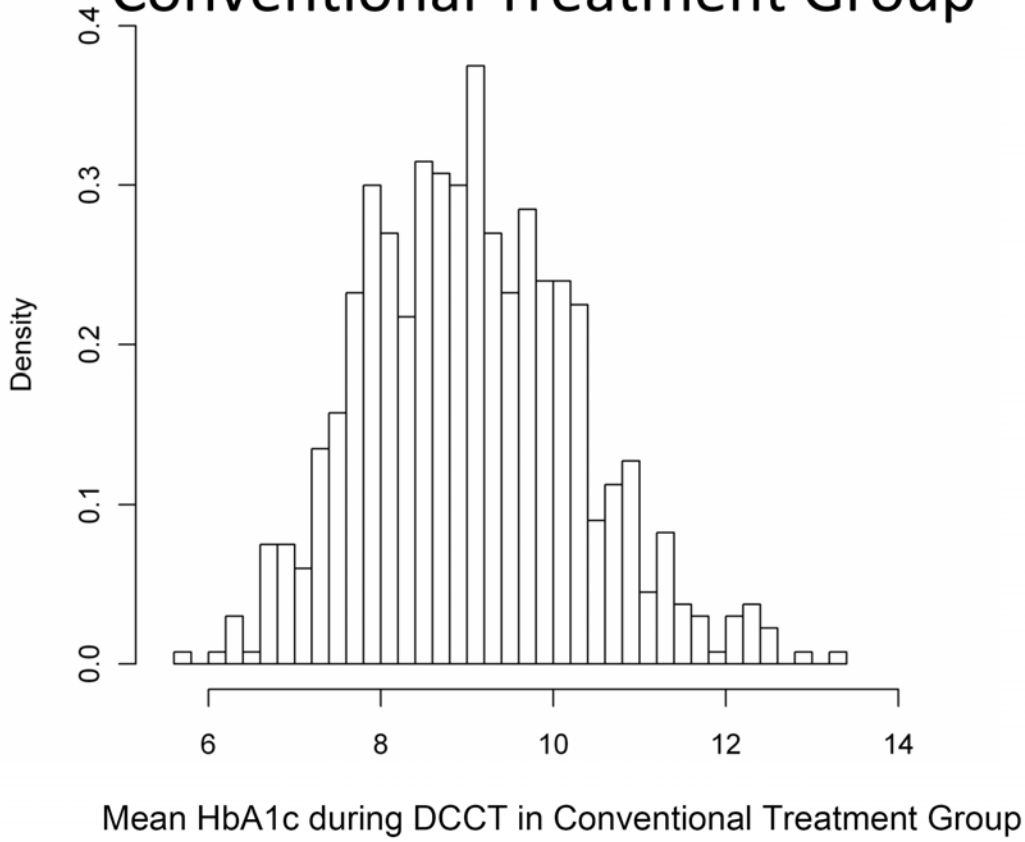

**Supplementary Figure 2.** Q-Q plot of the observed and expected distribution of  $-\log_{10}(p \text{ values})$  from the normal score 2df genotype test comparing the 841K SNPs for Stage 1 (association with mean HbA1c during DCCT in the conventional treatment group).

## Supplementary Figure 2: Q-Q plot for mean HbA1c in Conventional

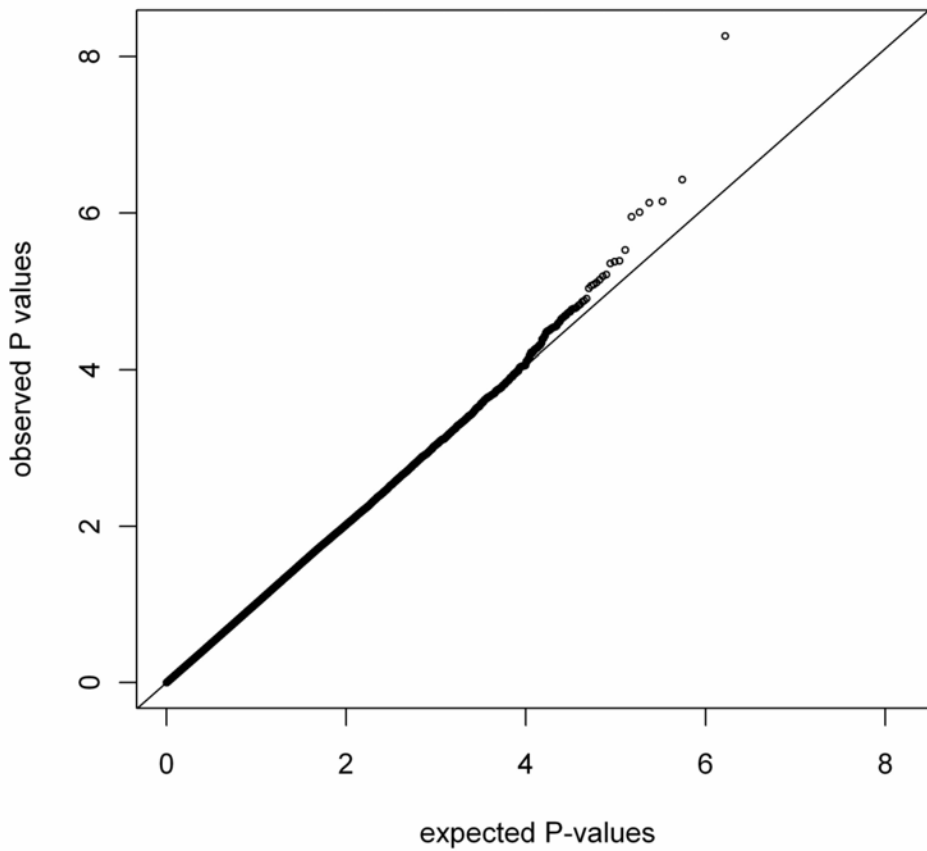

**Supplementary Figure 3.** Genome-wide association analysis of mean Hba1c in the Conventional group (Stage 1). The X axis is the genome (chromosomes 1-22 and X and Y chromosomes in different colors) and SNPs ordered along chromosomes by nucleotide position. The gaps in the middle of some chromosomes are due to the low SNP density around the centromeres. The Y axis is the  $-\log_{10}(P \text{ value})$ , so a value of 8 denotes a p value of  $10^{-8}$ . The blue horizontal line at 7.3 is the criterion for genome-wide significance ( $p=5 \times 10^{-8}$ ).

## Supplementary Figure 3: GWAS of mean Hba1c in the Conventional

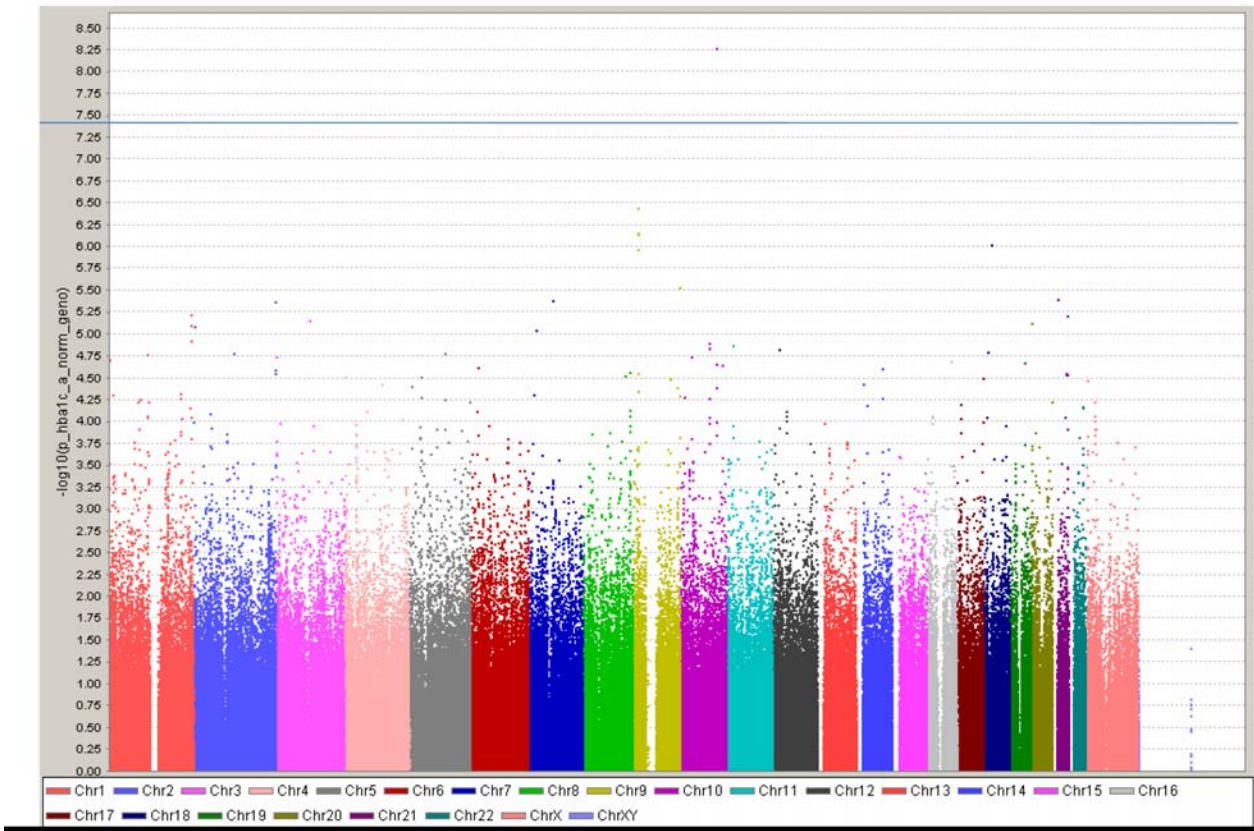

**Supplementary Figure 4.** Linkage disequilibrium between SNPs in a 1Mb region centered around rs1358030 in the *SORCS1* genomic region from chromosome 10 in CEU HapMap phase II data (release 23a). Linkage disequilibrium between SNPs is indicated by pairwise  $r^2$  value. The grey scale indicates the relative strength of linkage disequilibrium (darker, higher  $r^2$  value). *SORCS1* gene is annotated. The blue arrow indicates the location of rs1358030.

## Supplementary Figure 4: Linkage disequilibrium in a 1Mb region centered around rs1358030 in the *SORCS1*

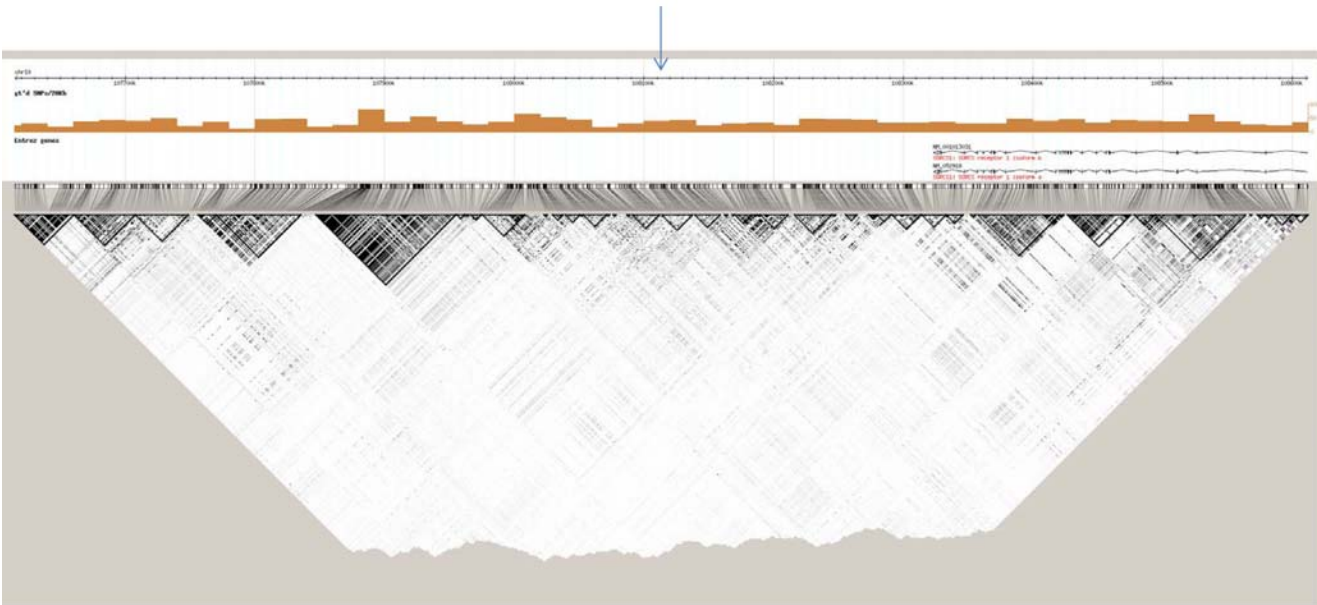



**Supplementary Figure 5.** Comparison of p values from the conventional treatment group for the top 62 SNPs with  $p < 10^{-4}$  from Stage 1 using mean HbA1c to the results from the mixed models using longitudinal repeated measures from Stage 2. For each SNP, the mean DCCT HbA1c  $-\log_{10}(p \text{ value})$  is plotted on the Y axis, while the repeated measures  $-\log_{10}(p \text{ value})$  is on the X axis, with a line indicating unity plotted. As can be seen, the evidence for association as assessed by the p value was smaller (i.e. more significant) using the longitudinal mixed model compared to the analysis of the mean, especially for the SNPs with the smallest p values from the mean results.

**Supplementary Figure 5:**  
**p values from conventional for the top 62 SNPs with**  
 **$p < 10^{-4}$  from mean (Y axis) and repeated (X axis)**

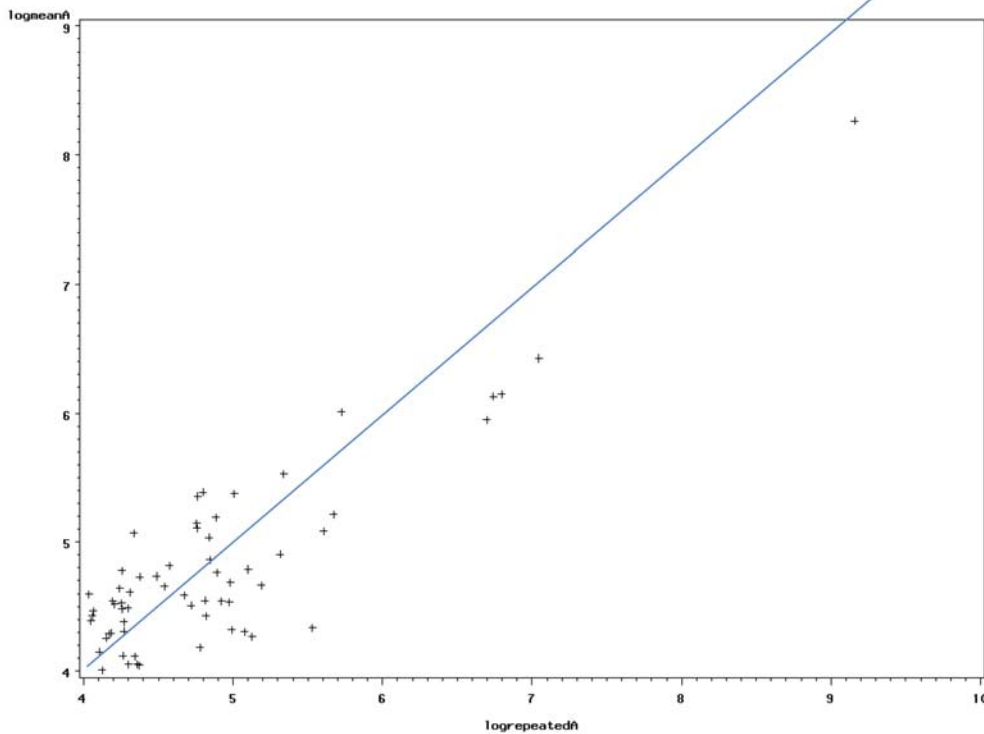

**Supplementary Figure 6.** Flow-chart describing the multi-stage analysis of the DCCT data. CON=Conventional Treatment Group, INT=Intensive Treatment Group.

## Supplementary Figure 6: Flowchart of DCCT analysis plan

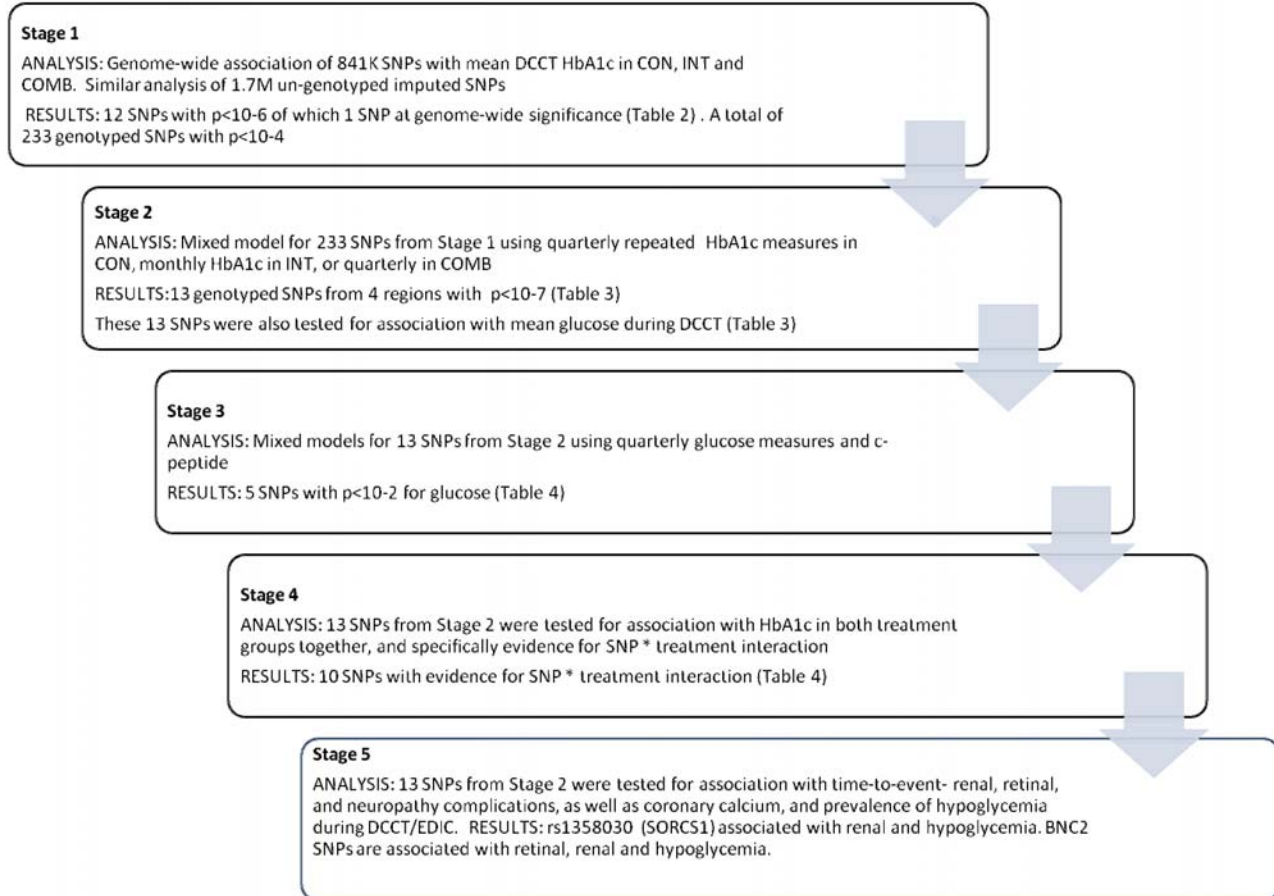

Supplementary Figure 7. Histogram of Mean HbA1c during DCCT in the intensive treatment group.

## Supplementary Figure 7: Mean HbA1c in Intensive treatment group

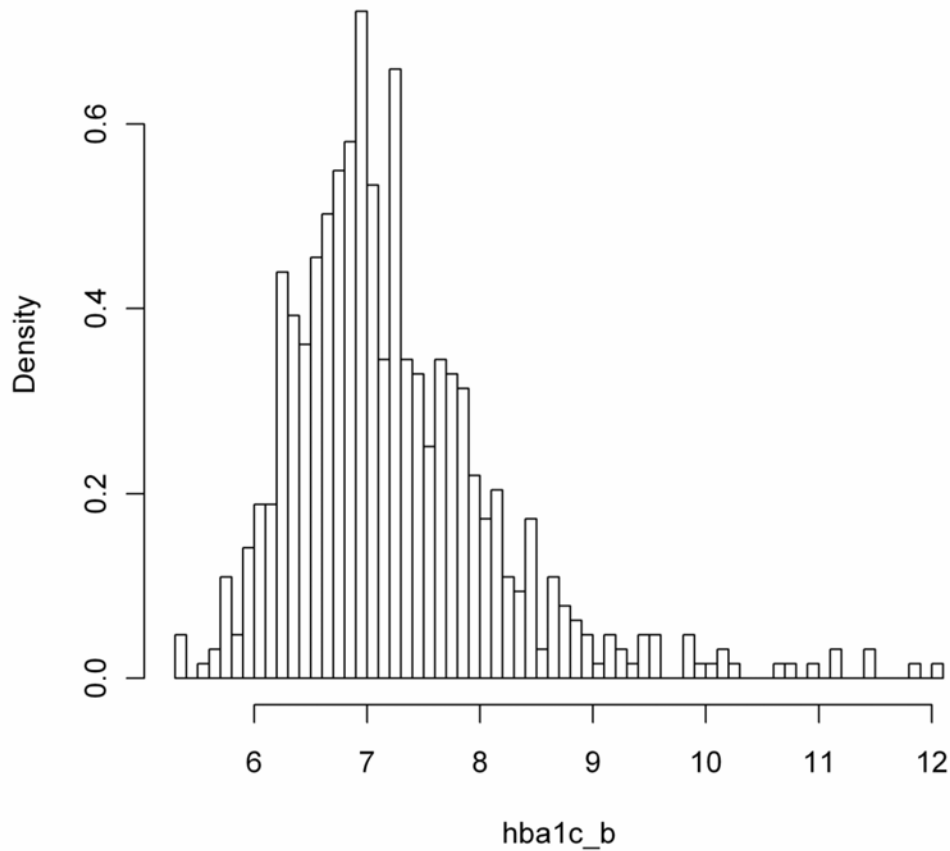

**Supplementary Figure 8.** QQ plot of SNP p value test statistics for INT group.

## Supplementary Figure 8: INT mean HbA1c qq plot

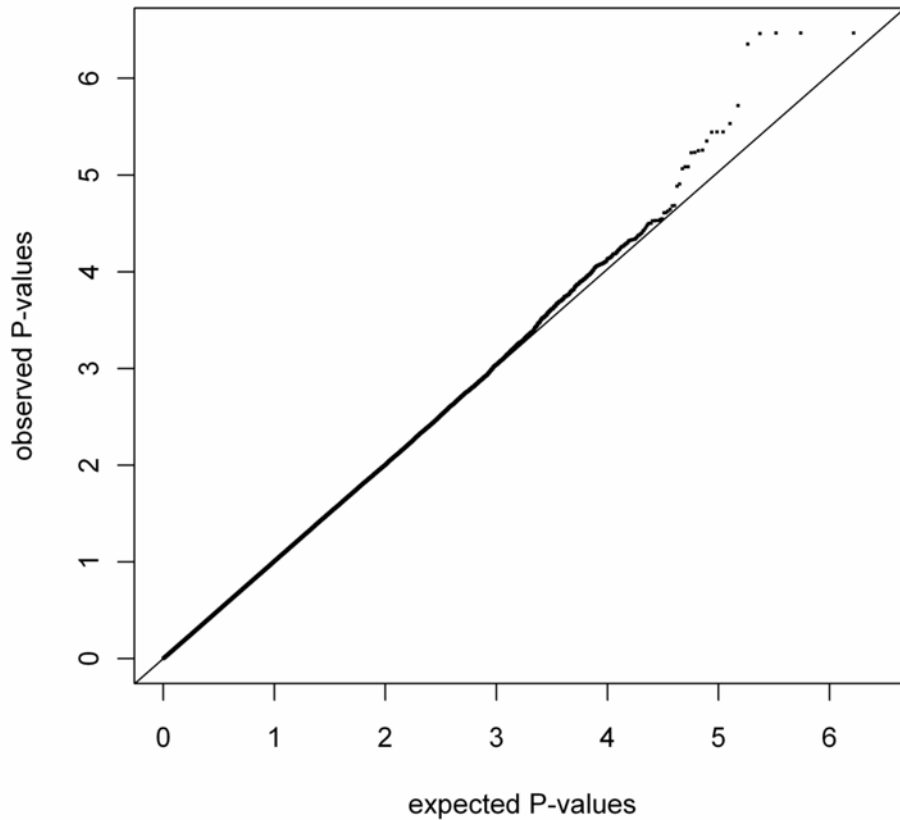

Supplementary Figure 9. Histogram of Mean HbA1c during DCCT in the combined treatment groups.

## Supplementary Figure 9: Mean HbA1c in both treatment groups

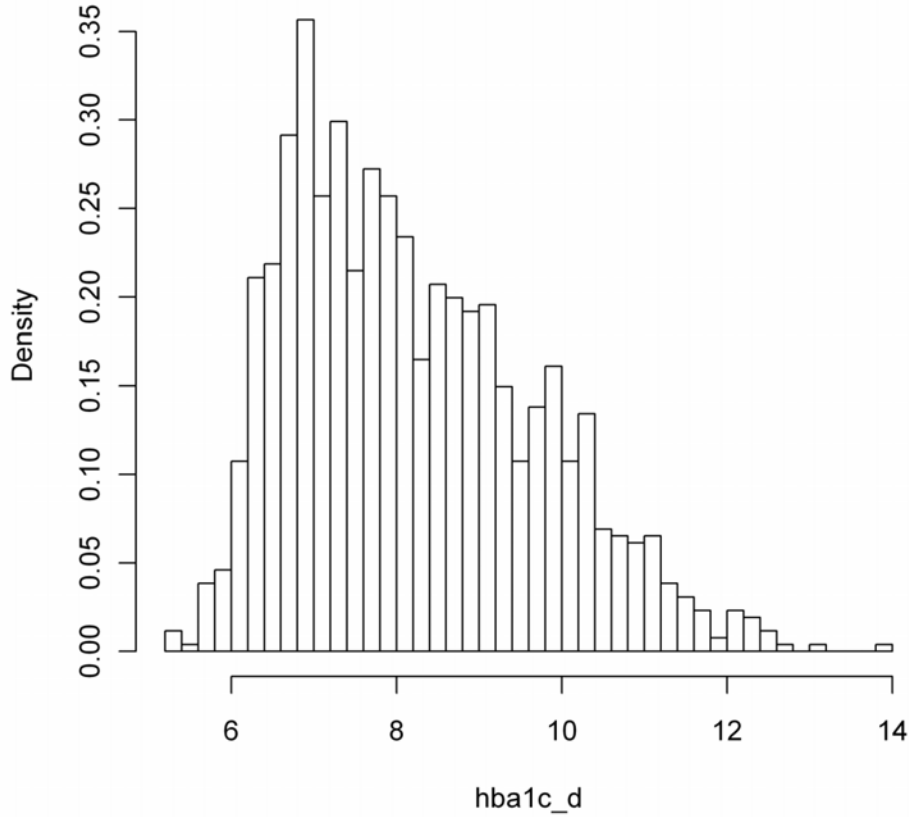

**Supplementary Figure 10.** QQ plot of SNP p value test statistics for the combined treatment groups.

## Supplementary Figure 10: QQ plot for Mean HbA1c in both treatment groups

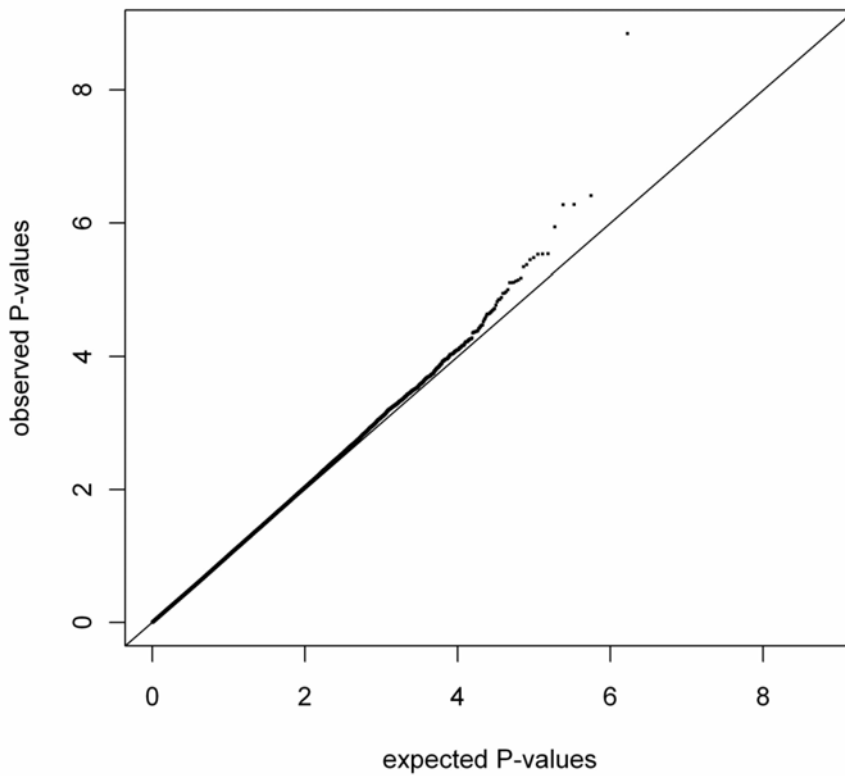

**Supplementary Figure 11.** Association results for mean HbA1c levels in the conventional treatment group at a region of 500kb surrounding the BNC2 locus (chromosome 9). On the left Y axis is the  $-\log_{10}(P)$  value for each SNP genotyped. On the right Y axis and plotted in the blue line is the recombination rate estimated from our data. The annotated genes in the region are indicated along the bottom of the figure. SNPs are colored based on their linkage disequilibrium with the most significant SNP, i.e. rs10810632, where blue indicates the index SNP, red  $r^2 \geq 0.8$ , orange  $0.8 > r^2 > 0.5$ , yellow  $0.5 > r^2 > 0.2$ , and white  $r^2 < 0.2$ .

### Supplementary Figure 11: Region plot for Conventional BNC2

1M pval\_hba1c\_a\_norm\_gen0 : rs10810632

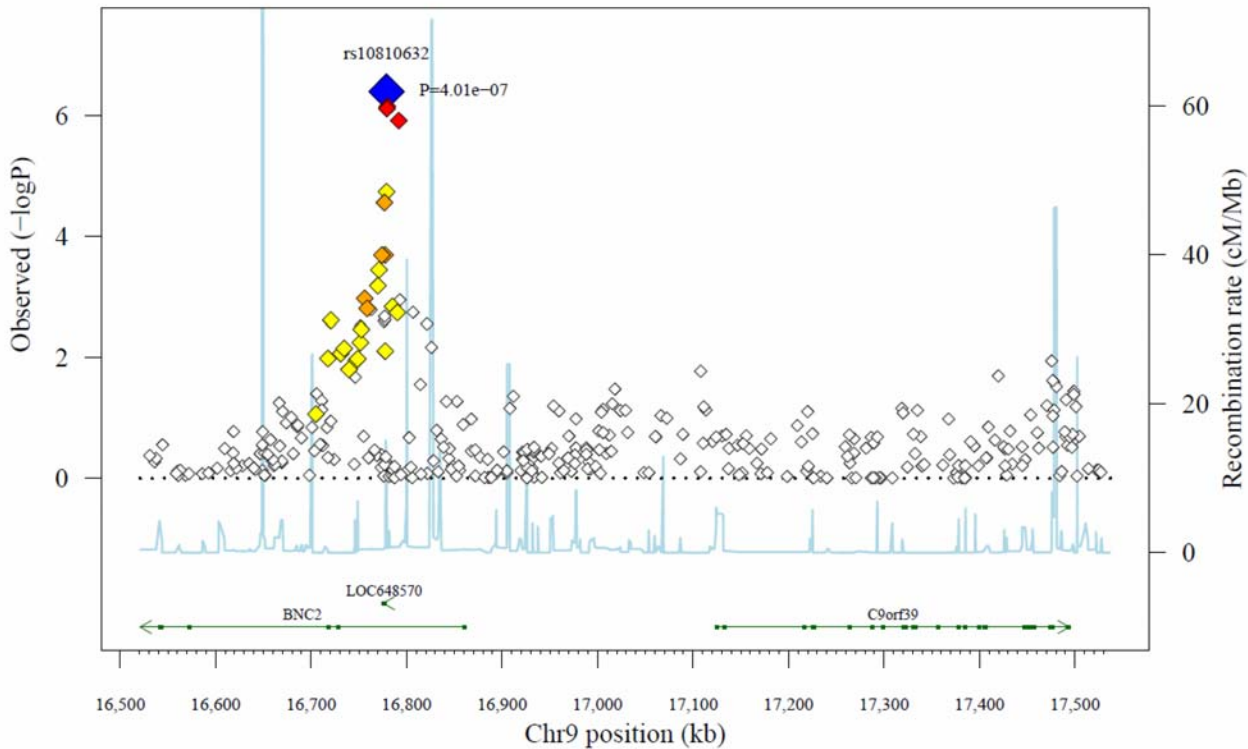

**Supplementary Figure 12.** Association results for mean HbA1c levels at a region of 500kb surrounding the WDR72 locus (chromosome 14) in the combined treatment groups. On the left Y axis is the  $-\log_{10}(P)$  value for each SNP genotyped. On the right Y axis and plotted in the blue line is the recombination rate estimated from our data. The annotated genes in the region are indicated along the bottom of the figure. SNPs are colored based on their linkage disequilibrium with the most significant SNP, i.e. rs11624318, where blue indicates the index SNP, red  $r^2 \geq 0.8$ , orange  $0.8 > r^2 > 0.5$ , yellow  $0.5 > r^2 > 0.2$ , and white  $r^2 < 0.2$ .

Supplementary Figure 12: Region plot for Combined chr 14 (WDR72)

1M pval\_hba1c\_d\_norm\_gen0 : rs11624318

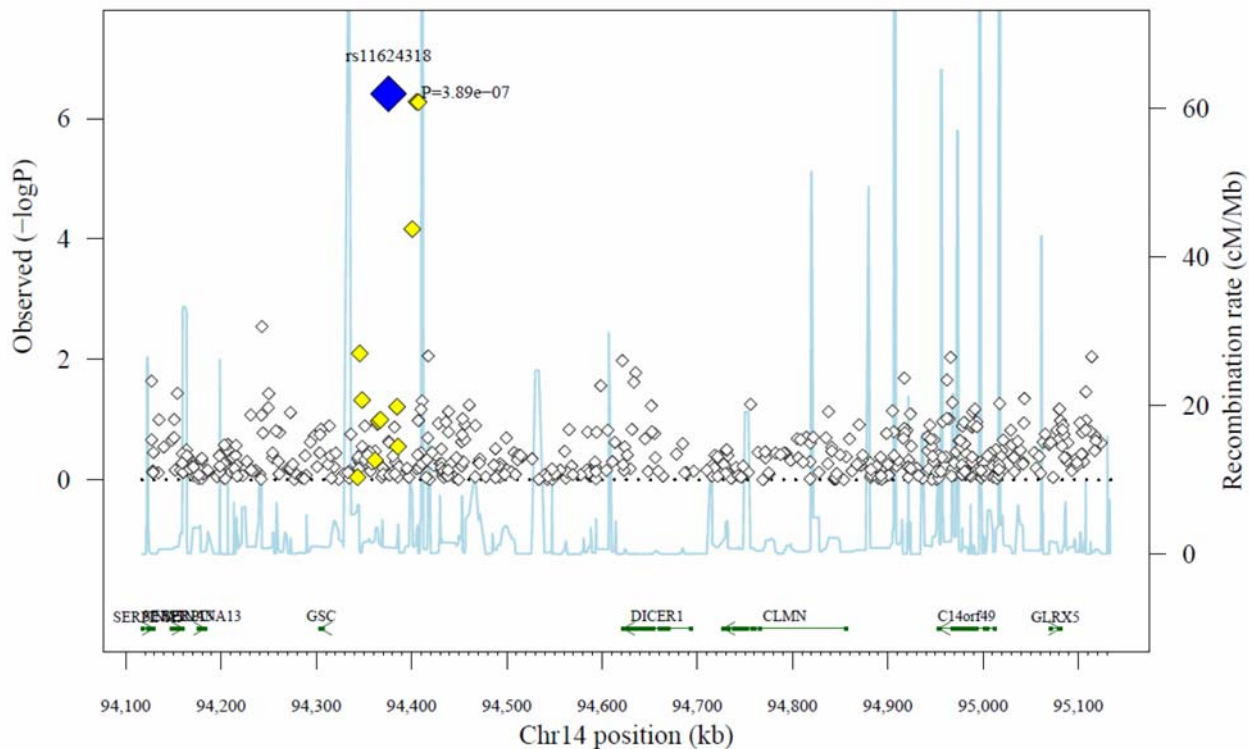



**Supplementary Figure 13.** Association results for mean HbA1c levels at a region of 500kb surrounding the GSC locus (chromosome 15) in the intensive treatment group. On the left Y axis is the  $-\log_{10}(P)$  value for each SNP genotyped. On the right Y axis and plotted in the blue line is the recombination rate estimated from our data. The annotated genes in the region are indicated along the bottom of the figure. SNPs are colored based on their linkage disequilibrium with the most significant SNP, i.e. rs566369, where blue indicates the index SNP, red  $r^2 \geq 0.8$ , orange  $0.8 > r^2 > 0.5$ , yellow  $0.5 > r^2 > 0.2$ , and white  $r^2 < 0.2$ .

Supplementary Figure 13: Region plot for Intensive chr 15 (GSC)

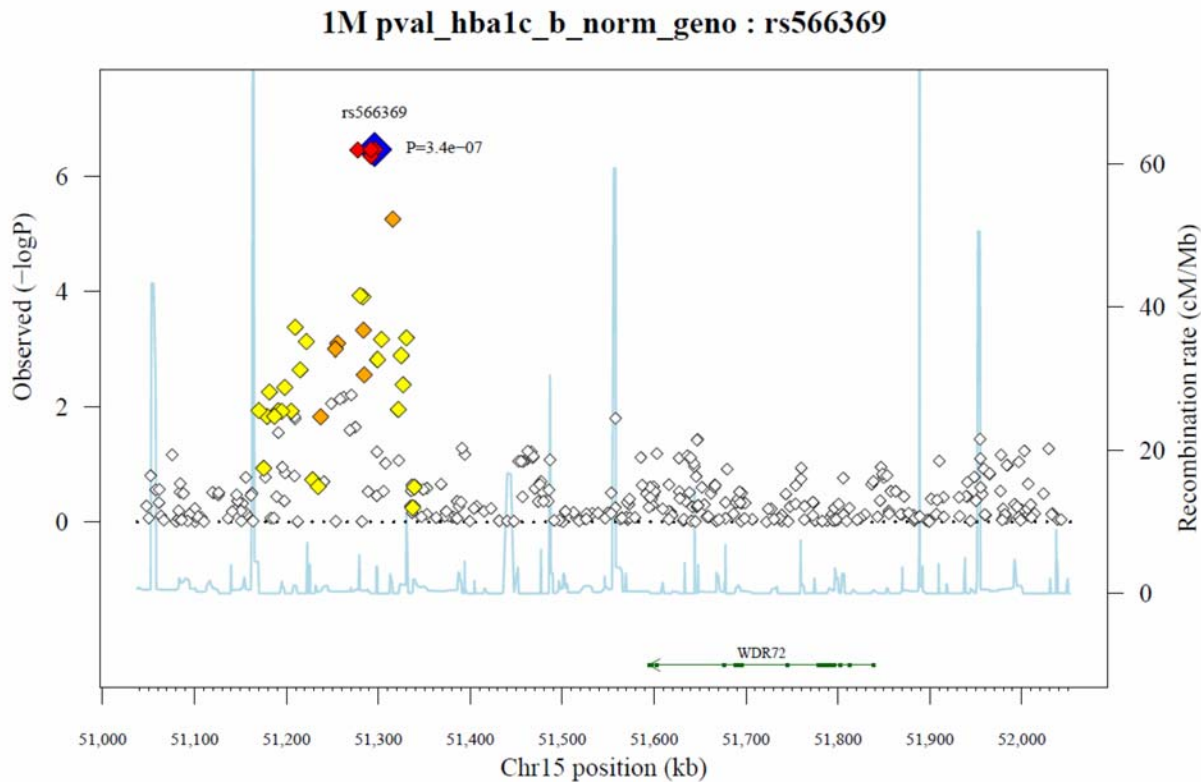

**Supplementary Figure 14.** Correlation of HbA1c measured at eligibility for DCCT probands and HbA1c measured either during the DCCT family study, or the EDIC genetics study in their sibling with type 1 diabetes.

## Supplementary Figure 14: Correlation of DCCT proband's eligibility HbA1c with type 1 diabetic sibs HbA1c

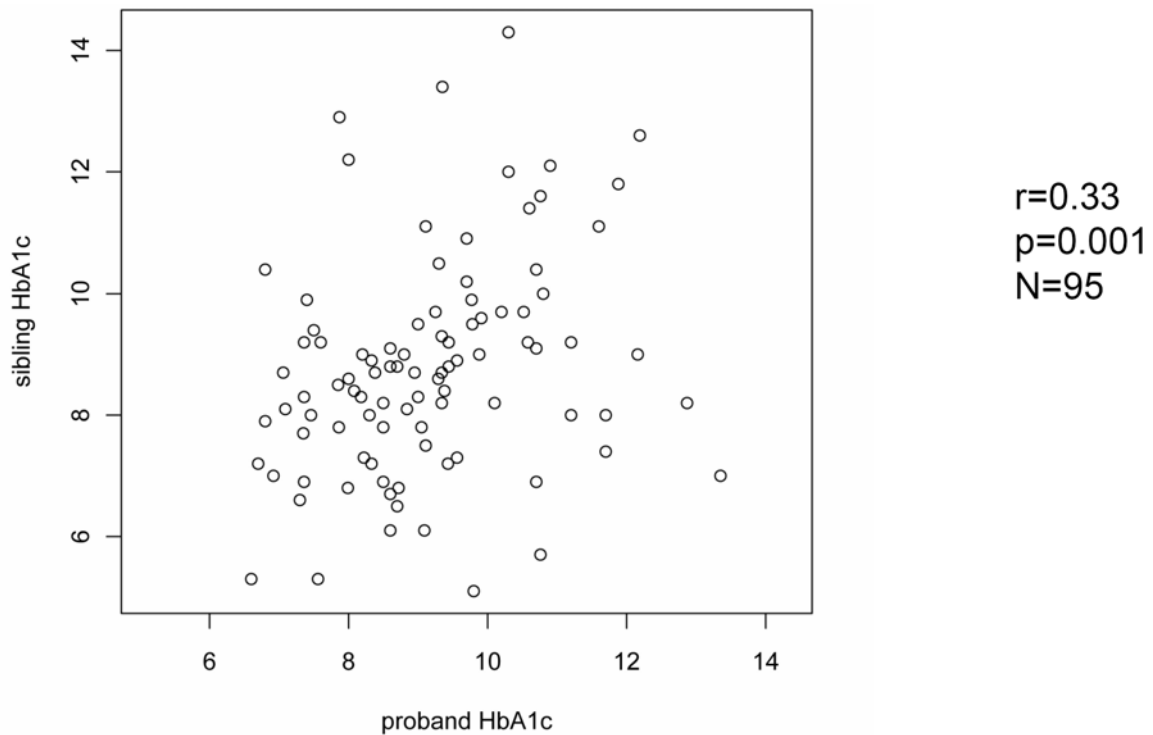

**Supplementary Figure 15.** Cluster-plot of called genotypes by theta and R for rs1358030 from the Illumina 1M data, plotted using polar co-ordinates. This shows that there is good separation of the 3 genotype groups at this SNP, consistent with high quality genotype data. Red are called TT, purple are called TC, and blue are called CC. No calls are in black.

# Supplementary Figure 15: Cluster-plot for rs1358030

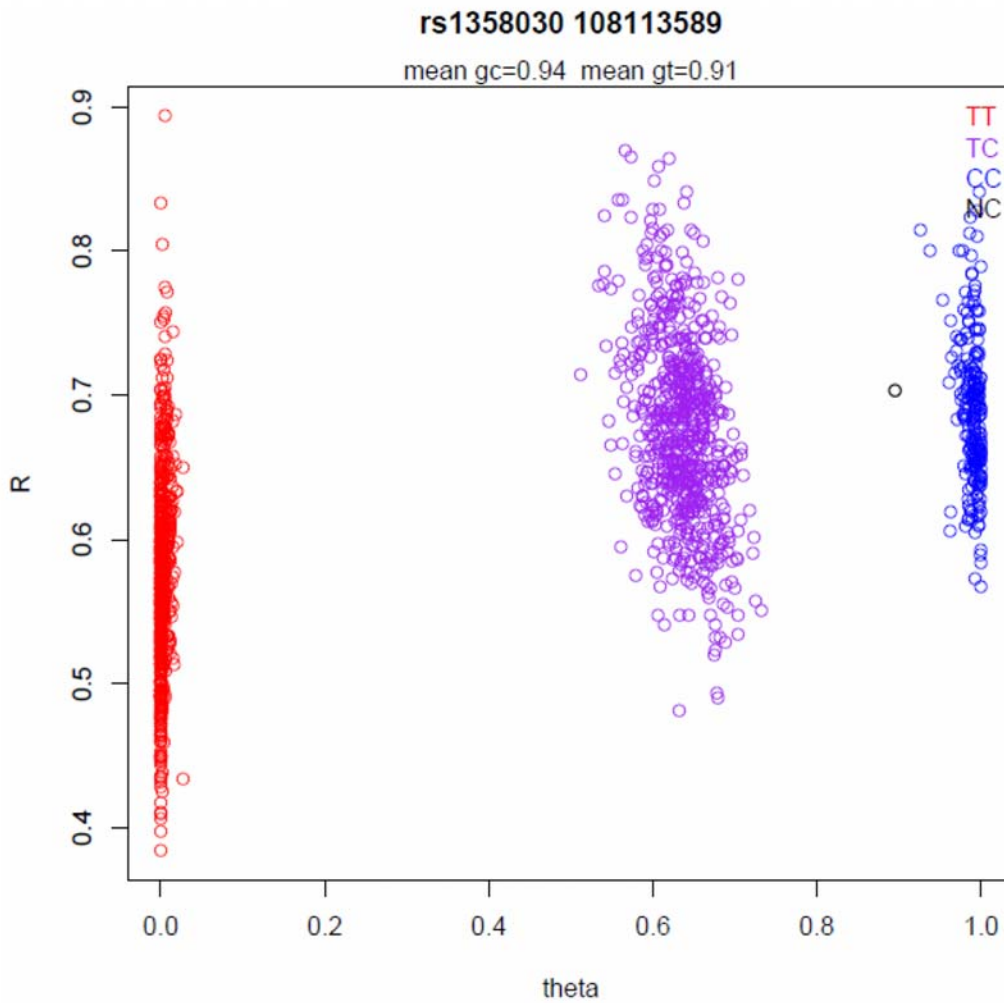

Supplement: supp_db09-0653_db09-0653_Online_Appendix.pdf [file supp_db09-0653_db09-0653_Online_Appendix.pdf]
